# Supplementary material for: Incremental cost-effectiveness of screening and laser treatment for diabetic retinopathy and macular edema in Malawi
Source: PLoS One. 2018 Jan 4;13(1):e0190742. doi: 10.1371/journal.pone.0190742 (PMC5754125; doi:10.1371/journal.pone.0190742)
Supplement: S1 Data — (XLSX) [file pone.0190742.s001.xlsx]

## Sheet: Clinical Data
MDRS patient no.	Event Name	Visit number	Date of visit	Final retinopathy grade RE	Final maculopathy grade RE	Final STDR RE	Final retinopathy grade LE	Final maculopathy grade LE	Final STDR LE	Final retinopathy grade	Final maculopathy grade	Listing right eye	Listing left eye	Treatment right eye	Treatment left eye
1	Baseline	One(baseline)	2011-12-20	20	0	No	10	0	No	20	0	Not listed	Not listed	Not listed	Not listed
1	Visit_two	Two	2012-12-17	10	0	No	10	0	No	10	0	Not listed	Not listed	Not listed	Not listed
1	Visit_three	Three	2013-12-16	10	0	No	10	0	No	10	0	Not listed	Not listed	Not listed	Not listed
2	Baseline	One(baseline)	2011-12-20	40	4	Yes	40	4	Yes	40	4	PRP alone	PRP alone	Completed course	Completed course
2	Visit_two	Two	2012-12-10	40	4	Yes	40	4	Yes	40	4	Grid alone	Not listed	Completed course	Not listed
2	Visit_three	Three	2013-12-13	20	0	No	20	4	Yes	20	4	PRP alone	PRP alone	Completed course	Completed course
3	Baseline	One(baseline)	2011-12-20	10	0	No	10	0	No	10	0	Not listed	Not listed	Not listed	Not listed
3	Visit_two	Two	2013-01-21	10	0	No	10	0	No	10	0	Not listed	Not listed	Not listed	Not listed
3	Visit_three	Three	2013-12-13	10	0	No	10	0	No	10	0	Not listed	Not listed	Not listed	Not listed
4	Baseline	One(baseline)	2012-01-03	30	0	No	30	0	No	30	0	Not listed	Not listed	Not listed	Not listed
5	Baseline	One(baseline)	2012-01-03	10	0	No	10	0	No	10	0	Not listed	Not listed	Not listed	Not listed
5	Visit_two	Two	2012-12-10	10	0	No	10	0	No	10	0	Not listed	Not listed	Not listed	Not listed
5	Visit_three	Three	2013-12-09	10	0	No	10	0	No	10	0	Not listed	Not listed	Not listed	Not listed
6	Baseline	One(baseline)	2012-01-03	10	0	No	10	0	No	10	0	Not listed	Not listed	Not listed	Not listed
7	Baseline	One(baseline)	2012-01-06	10	0	No	10	0	No	10	0	Not listed	Not listed	Not listed	Not listed
7	Visit_two	Two	2013-02-01	10	0	No	10	0	No	10	0	Not listed	Not listed	Not listed	Not listed
8	Baseline	One(baseline)	2012-01-06	10	0	No	20	0	No	20	0	Not listed	Not listed	Not listed	Not listed
8	Visit_two	Two	2012-12-17	10	0	No	10	0	No	10	0	Not listed	Not listed	Not listed	Not listed
8	Visit_three	Three	2014-01-13	10	0	No	10	0	No	10	0	Not listed	Not listed	Not listed	Not listed
9	Baseline	One(baseline)	2012-01-06	10	0	No	20	0	No	20	0	Not listed	Not listed	Not listed	Not listed
9	Visit_two	Two	2012-12-14	20	4	Yes	10	0	No	20	4	Not listed	Not listed	Not listed	Not listed
9	Visit_three	Three	2013-12-09	20	0	No	10	0	No	20	0	Not listed	Not listed	Not listed	Not listed
10	Baseline	One(baseline)	2012-01-06	10	0	No	10	0	No	10	0	Not listed	Not listed	Not listed	Not listed
10	Visit_two	Two	2012-12-17	10	0	No	10	0	No	10	0	Not listed	Not listed	Not listed	Not listed
10	Visit_three	Three	2014-01-10	10	0	No	10	0	No	10	0	Not listed	Not listed	Not listed	Not listed
11	Baseline	One(baseline)	2012-01-06	20	0	No	20	0	No	20	0	Not listed	Not listed	Not listed	Not listed
11	Visit_two	Two	2012-12-21	20	0	No	10	0	No	20	0	Not listed	Not listed	Not listed	Not listed
11	Visit_three	Three	2014-04-11	20	2	No	20	4	Yes	20	4	Not listed	Not listed	Not listed	Not listed
12	Baseline	One(baseline)	2012-01-10	70	4	Yes	70	4	Yes	70	4	PRP alone	PRP + grid	Started but not completed	Started but not completed
12	Visit_two	Two	2012-12-21	71	4	Yes	71	90	Yes	71	4	PRP alone	PRP alone	Listed but not started	Listed but not started
12	Visit_three	Three	2013-12-09	71	4	Yes	71	4	Yes	71	4	PRP alone	PRP alone	Listed but not started	Listed but not started
13	Baseline	One(baseline)	2012-01-10	10	0	No	10	0	No	10	0	Not listed	Not listed	Not listed	Not listed
13	Visit_two	Two	2012-12-10	10	0	No	10	0	No	10	0	Not listed	Not listed	Not listed	Not listed
13	Visit_three	Three	2013-12-09	10	0	No	10	0	No	10	0	Not listed	Not listed	Not listed	Not listed
14	Baseline	One(baseline)	2012-01-10	10	0	No	10	0	No	10	0	Not listed	Not listed	Not listed	Not listed
14	Visit_two	Two	2012-12-10	10	0	No	10	0	No	10	0	Not listed	Not listed	Not listed	Not listed
14	Visit_three	Three	2013-12-09	10	0	No	20	0	No	20	0	Not listed	Not listed	Not listed	Not listed
15	Baseline	One(baseline)	2012-01-10	40	4	Yes	20	3	Yes	40	4	Not listed	Not listed	Not listed	Not listed
15	Visit_two	Two	2012-12-17	30	3	Yes	30	4	Yes	30	4	PRP alone	PRP alone	Completed course	Completed course
15	Visit_three	Three	2014-01-13	30	0	No	20	0	No	30	0	Not listed	Not listed	Not listed	Not listed
16	Baseline	One(baseline)	2012-01-10	20	4	Yes	20	4	Yes	20	4	Not listed	Not listed	Not listed	Not listed
16	Visit_two	Two	2012-12-14	20	3	Yes	20	4	Yes	20	4	Not listed	Not listed	Not listed	Not listed
16	Visit_three	Three	2013-12-09	20	0	No	20	4	No	20	4	Not listed	Not listed	Not listed	Not listed
17	Baseline	One(baseline)	2012-01-12	70	4	Yes	71	4	Yes	71	4	PRP + grid	PRP + grid	Completed course	Completed course
18	Baseline	One(baseline)	2012-01-12	30	0	No	40	0	Yes	40	0	Not listed	Not listed	Not listed	Not listed
19	Baseline	One(baseline)	2012-01-12	10	0	No	10	0	No	10	0	Not listed	Not listed	Not listed	Not listed
19	Visit_two	Two	2012-12-13	10	0	No	20	0	No	20	0	Not listed	Not listed	Not listed	Not listed
19	Visit_three	Three	2013-12-19	10	0	No	10	0	No	10	0	Not listed	Not listed	Not listed	Not listed
20	Baseline	One(baseline)	2012-01-13	30	4	Yes	20	4	Yes	30	4	Not listed	Not listed	Not listed	Not listed
20	Visit_two	Two	2012-12-14	20	4	Yes	20	4	Yes	20	4	Focal alone	Grid alone	Completed course	Completed course
20	Visit_three	Three	2013-12-16	20	4	Yes	20	4	Yes	20	4	Focal alone	Grid alone	Completed course	Completed course
21	Baseline	One(baseline)	2012-01-13	10	0	No	10	0	No	10	0	Not listed	Not listed	Not listed	Not listed
21	Visit_two	Two	2012-12-17	10	0	No	30	0	No	30	0	Not listed	Not listed	Not listed	Not listed
21	Visit_three	Three	2014-02-14	10	0	No	10	0	No	10	0	Not listed	Not listed	Not listed	Not listed
22	Baseline	One(baseline)	2012-01-13	10	0	No	10	0	No	10	0	Not listed	Not listed	Not listed	Not listed
22	Visit_two	Two	2012-12-14	10	0	No	10	0	No	10	0	Not listed	Not listed	Not listed	Not listed
22	Visit_three	Three	2013-12-13	20	0	No	20	0	No	20	0	Not listed	Not listed	Not listed	Not listed
23	Baseline	One(baseline)	2012-01-13	10	0	No	10	0	No	10	0	Not listed	Not listed	Not listed	Not listed
23	Visit_two	Two	2012-12-10	10	0	No	10	0	No	10	0	Not listed	Not listed	Not listed	Not listed
23	Visit_three	Three	2013-12-06	10	0	No	10	0	No	10	0	Not listed	Not listed	Not listed	Not listed
24	Baseline	One(baseline)	2012-01-13	10	0	No	10	0	No	10	0	Not listed	Not listed	Not listed	Not listed
24	Visit_two	Two	2012-12-14	10	0	No	10	0	No	10	0	Not listed	Not listed	Not listed	Not listed
24	Visit_three	Three	2013-12-13	10	0	No	10	0	No	10	0	Not listed	Not listed	Not listed	Not listed
25	Baseline	One(baseline)	2012-01-17	10	0	No	10	0	No	10	0	Not listed	Not listed	Not listed	Not listed
25	Visit_two	Two	2012-12-10	10	0	No	10	0	No	10	0	Not listed	Not listed	Not listed	Not listed
25	Visit_three	Three	2013-12-06	20	0	No	20	0	No	20	0	Not listed	Not listed	Not listed	Not listed
26	Baseline	One(baseline)	2012-01-17	10	0	No	10	0	No	10	0	Not listed	Not listed	Not listed	Not listed
26	Visit_two	Two	2012-12-17	10	0	No	20	0	No	20	0	Not listed	Not listed	Not listed	Not listed
27	Baseline	One(baseline)	2012-01-17	30	4	Yes	40	4	Yes	40	4	Focal alone	Not listed	Completed course	Not listed
27	Visit_two	Two	2012-12-10	30	4	Yes	40	4	Yes	40	4	Not listed	Not listed	Not listed	Not listed
27	Visit_three	Three	2013-12-13	40	3	Yes	40	4	Yes	40	4	Not listed	Focal alone	Not listed	Completed course
28	Baseline	One(baseline)	2012-01-17	30	4	Yes	40	4	Yes	40	4	Not listed	PRP + focal	Not listed	Completed course
28	Visit_two	Two	2013-01-04	40	4	Yes	60	4	Yes	60	4	PRP + focal	PRP + grid	Started but not completed	Listed but not started
28	Visit_three	Three	2013-12-13	60	4	Yes	60	4	Yes	60	4	PRP + grid	PRP + grid	Completed course	Completed course
29	Baseline	One(baseline)	2012-01-17	10	0	No	10	0	No	10	0	Not listed	Not listed	Not listed	Not listed
29	Visit_two	Two	2012-12-10	10	0	No	10	0	No	10	0	Not listed	Not listed	Not listed	Not listed
29	Visit_three	Three	2013-12-06	20	4	Yes	10	0	No	20	4	Not listed	Not listed	Not listed	Not listed
30	Baseline	One(baseline)	2012-01-19	10	0	No	20	0	No	20	0	Not listed	Not listed	Not listed	Not listed
30	Visit_two	Two	2013-04-18	10	0	No	10	0	No	10	0	Not listed	Not listed	Not listed	Not listed
30	Visit_three	Three	2014-01-16	10	0	No	10	0	No	10	0	Not listed	Not listed	Not listed	Not listed
31	Baseline	One(baseline)	2012-01-19	10	0	No	10	0	No	10	0	Not listed	Not listed	Not listed	Not listed
31	Visit_two	Two	2012-12-13	10	0	No	10	0	No	10	0	Not listed	Not listed	Not listed	Not listed
32	Baseline	One(baseline)	2012-01-19	10	0	No	10	0	No	10	0	Not listed	Not listed	Not listed	Not listed
33	Baseline	One(baseline)	2012-01-19	70	4	Yes	60	4	Yes	70	4	PRP alone	PRP + focal	Completed course	Completed course
33	Visit_two	Two	2013-01-03	60	4	Yes	70	4	Yes	70	4	PRP alone	PRP + grid	Completed course	Completed course
33	Visit_three	Three	2014-01-23	40	4	Yes	40	4	Yes	40	4	PRP alone	PRP alone	Completed course	Completed course
34	Baseline	One(baseline)	2012-01-19	10	0	No	20	0	No	20	0	Not listed	Not listed	Not listed	Not listed
34	Visit_two	Two	2012-12-13	10	0	No	10	0	No	10	0	Not listed	Not listed	Not listed	Not listed
34	Visit_three	Three	2013-12-19	10	0	No	10	0	No	10	0	Not listed	Not listed	Not listed	Not listed
35	Baseline	One(baseline)	2012-01-20	10	0	No	10	0	No	10	0	Not listed	Not listed	Not listed	Not listed
35	Visit_two	Two	2012-12-14	10	0	No	10	0	No	10	0	Not listed	Not listed	Not listed	Not listed
35	Visit_three	Three	2014-02-11	10	0	No	10	0	No	10	0	Not listed	Not listed	Not listed	Not listed
36	Baseline	One(baseline)	2012-01-20	10	0	No	10	0	No	10	0	Not listed	Not listed	Not listed	Not listed
36	Visit_two	Two	2013-03-01	10	0	No	10	0	No	10	0	Not listed	Not listed	Not listed	Not listed
36	Visit_three	Three	2014-02-11	10	0	No	20	0	No	20	0	Not listed	Not listed	Not listed	Not listed
37	Baseline	One(baseline)	2012-01-20	20	0	No	10	0	No	20	0	Not listed	Not listed	Not listed	Not listed
37	Visit_two	Two	2013-02-08	20	0	No	20	0	No	20	0	Not listed	Not listed	Not listed	Not listed
37	Visit_three	Three	2013-12-13	20	0	No	20	0	No	20	0	Not listed	Not listed	Not listed	Not listed
38	Baseline	One(baseline)	2012-01-24	20	4	Yes	10	0	No	20	4	Not listed	Not listed	Not listed	Not listed
38	Visit_two	Two	2012-12-10	20	4	Yes	30	0	No	30	4	Not listed	Not listed	Not listed	Not listed
38	Visit_three	Three	2013-12-13	20	4	Yes	20	0	No	20	4	Not listed	Not listed	Not listed	Not listed
39	Baseline	One(baseline)	2012-01-24	10	0	No	10	0	No	10	0	Not listed	Not listed	Not listed	Not listed
39	Visit_two	Two	2013-01-04	10	0	No	10	0	No	10	0	Not listed	Not listed	Not listed	Not listed
39	Visit_three	Three	2014-01-10	20	0	No	10	0	No	20	0	Not listed	Not listed	Not listed	Not listed
40	Baseline	One(baseline)	2012-01-24	10	0	No	10	0	No	10	0	Not listed	Not listed	Not listed	Not listed
40	Visit_two	Two	2012-12-17	10	0	No	10	0	No	10	0	Not listed	Not listed	Not listed	Not listed
40	Visit_three	Three	2013-12-13	10	0	No	20	0	No	20	0	Not listed	Not listed	Not listed	Not listed
41	Baseline	One(baseline)	2012-01-24	10	0	No	10	0	No	10	0	Not listed	Not listed	Not listed	Not listed
41	Visit_two	Two	2012-12-17	10	0	No	10	0	No	10	0	Not listed	Not listed	Not listed	Not listed
41	Visit_three	Three	2013-12-20	10	0	No	10	0	No	10	0	Not listed	Not listed	Not listed	Not listed
42	Baseline	One(baseline)	2012-01-26	10	0	No	10	0	No	10	0	Not listed	Not listed	Not listed	Not listed
42	Visit_two	Two	2013-01-03	10	0	No	10	0	No	10	0	Not listed	Not listed	Not listed	Not listed
42	Visit_three	Three	2014-02-27	10	0	No	10	0	No	10	0	Not listed	Not listed	Not listed	Not listed
43	Baseline	One(baseline)	2012-01-26	10	0	No	10	0	No	10	0	Not listed	Not listed	Not listed	Not listed
43	Visit_two
44	Baseline	One(baseline)	2012-01-26	50	4	Yes	50	0	Yes	50	4	PRP + focal	Not listed	Completed course	Not listed
44	Visit_two	Two	2013-01-31	50	4	Yes	40	2	Yes	50	4	Not listed	Not listed	Not listed	Not listed
44	Visit_three	Three	2013-12-19	40	4	Yes	50	4	Yes	50	4	Grid alone	PRP + grid	Listed but not started	Started but not completed
45	Baseline	One(baseline)	2012-01-26	10	0	No				10	0	Not listed	Not listed	Not listed	Not listed
45	Visit_two	Two	2012-12-13	10	0	No				10	0	Not listed	Not listed	Not listed	Not listed
45	Visit_three	Three	2013-12-19	10	0	No	90	90		10	0	Not listed	Not listed	Not listed	Not listed
46	Baseline	One(baseline)	2012-01-26	10	0	No	10	0	No	10	0	Not listed	Not listed	Not listed	Not listed
46	Visit_two	Two	2012-12-13	10	0	No	10	0	No	10	0	Not listed	Not listed	Not listed	Not listed
46	Visit_three	Three	2013-12-19	10	0	No	20	0	No	20	0	Not listed	Not listed	Not listed	Not listed
47	Baseline	One(baseline)	2012-01-27	10	0	No	90	8	Yes	10	8	Not listed	Not listed	Not listed	Not listed
47	Visit_two	Two	2012-12-17	10	0	No	90	90	Yes	10	0	Not listed	Not listed	Not listed	Not listed
47	Visit_three	Three	2014-01-10	10	0	No	90	90	Yes	10	0	Not listed	Not listed	Not listed	Not listed
48	Baseline	One(baseline)	2012-01-27	70	4	Yes	60	4	Yes	70	4	PRP + grid	PRP + grid	Completed course	Completed course
48	Visit_two	Two	2012-12-21	70	4	Yes	40	4	Yes	70	4	PRP alone	PRP alone	Completed course	Completed course
48	Visit_three	Three	2014-03-27	71	4	Yes	71	4	Yes	71	4	PRP + grid	PRP alone	Completed course	Completed course
49	Baseline	One(baseline)	2012-01-27	20	4	Yes	20	4	Yes	20	4	Not listed	Not listed	Not listed	Not listed
49	Visit_two	Two	2012-12-17	20	3	Yes	20	4	Yes	20	4	Not listed	Not listed	Not listed	Not listed
49	Visit_three	Three	2013-12-16	20	3	Yes	20	0	No	20	3	Not listed	Not listed	Not listed	Not listed
50	Baseline	One(baseline)	2012-01-27	10	0	No	10	0	No	10	0	Not listed	Not listed	Not listed	Not listed
50	Visit_two	Two	2012-12-17	10	0	No	10	0	No	10	0	Not listed	Not listed	Not listed	Not listed
50	Visit_three	Three	2013-12-16	10	0	No	10	0	No	10	0	Not listed	Not listed	Not listed	Not listed
51	Baseline	One(baseline)	2012-01-27	20	0	No	20	3	Yes	20	3	Not listed	Not listed	Not listed	Not listed
51	Visit_two	Two	2013-03-01	20	0	No	30	0	No	30	0	Not listed	Not listed	Not listed	Not listed
51	Visit_three	Three	2013-12-16	20	4	Yes	20	0	No	20	4	Not listed	Not listed	Not listed	Not listed
52	Baseline	One(baseline)	2012-01-31	20	0	No	20	0	No	20	0	Not listed	Not listed	Not listed	Not listed
52	Visit_two	Two	2013-03-15	20	0	No	20	0	No	20	0	Not listed	Not listed	Not listed	Not listed
52	Visit_three	Three	2014-03-27	20	0	No	30	0	No	30	0	Not listed	Not listed	Not listed	Not listed
53	Baseline	One(baseline)	2012-01-31	10	0	No	10	0	No	10	0	Not listed	Not listed	Not listed	Not listed
53	Visit_two	Two	2013-04-19	30	0	No	10	0	No	30	0	Not listed	Not listed	Not listed	Not listed
53	Visit_three	Three	2014-02-11	20	0	No	20	0	No	20	0	Not listed	Not listed	Not listed	Not listed
54	Baseline	One(baseline)	2012-01-31	10	0	No	10	0	No	10	0	Not listed	Not listed	Not listed	Not listed
54	Visit_two	Two	2013-01-04	10	0	No	10	0	No	10	0	Not listed	Not listed	Not listed	Not listed
54	Visit_three	Three	2013-12-16	20	0	No	10	0	No	20	0	Not listed	Not listed	Not listed	Not listed
55	Baseline	One(baseline)	2012-01-31	10	0	No	20	0	No	20	0	Not listed	Not listed	Not listed	Not listed
55	Visit_two
55	Visit_three	Three	2014-03-28	30	4	Yes	40	4	Yes	40	4	Focal alone	Focal alone	Completed course	Completed course
56	Baseline	One(baseline)	2012-01-31	40	0	Yes	20	0	No	40	0	Not listed	Not listed	Not listed	Not listed
56	Visit_two	Two	2012-12-21	20	4	Yes	20	3	Yes	20	4	Not listed	Not listed	Not listed	Not listed
56	Visit_three	Three	2014-02-11	40	0	Yes	40	0	Yes	40	0	Not listed	Not listed	Not listed	Not listed
57	Baseline	One(baseline)	2012-02-02	10	0	No	10	0	No	10	0	Not listed	Not listed	Not listed	Not listed
57	Visit_two	Two	2013-01-03	10	0	No	10	0	No	10	0	Not listed	Not listed	Not listed	Not listed
57	Visit_three	Three	2013-12-19	10	0	No	20	0	No	20	0	Not listed	Not listed	Not listed	Not listed
58	Baseline	One(baseline)	2012-02-02	20	0	No	10	0	No	20	0	Not listed	Not listed	Not listed	Not listed
58	Visit_two	Two	2013-01-03	20	0	No	10	0	No	20	0	Not listed	Not listed	Not listed	Not listed
58	Visit_three	Three	2013-12-19	30	0	No	30	0	No	30	0	Not listed	Not listed	Not listed	Not listed
59	Baseline	One(baseline)	2012-02-02	10	0	No	10	0	No	10	0	Not listed	Not listed	Not listed	Not listed
59	Visit_two	Two	2013-01-03	10	0	No	10	0	No	10	0	Not listed	Not listed	Not listed	Not listed
59	Visit_three	Three	2014-02-20	10	0	No	10	0	No	10	0	Not listed	Not listed	Not listed	Not listed
61	Baseline	One(baseline)	2012-02-02	10	0	No	10	0	No	10	0	Not listed	Not listed	Not listed	Not listed
61	Visit_two	Two	2013-05-02	10	0	No	10	0	No	10	0	Not listed	Not listed	Not listed	Not listed
61	Visit_three	Three	2013-12-19	10	0	No	20	0	No	20	0	Not listed	Not listed	Not listed	Not listed
62	Baseline	One(baseline)	2012-02-03	20	0	No	20	0	No	20	0	Not listed	Not listed	Not listed	Not listed
62	Visit_two	Two	2012-12-21	20	0	No	20	0	No	20	0	Not listed	Not listed	Not listed	Not listed
62	Visit_three	Three	2013-12-16	20	0	No	20	4	Yes	20	4	Not listed	Not listed	Not listed	Not listed
63	Baseline	One(baseline)	2012-02-03	20	0	No	10	0	No	20	0	Not listed	Not listed	Not listed	Not listed
63	Visit_two	Two	2013-01-07	10	0	No	20	0	No	20	0	Not listed	Not listed	Not listed	Not listed
63	Visit_three	Three	2014-01-10	20	0	No	20	4	Yes	20	4	Not listed	Focal alone	Not listed	Completed course
64	Baseline	One(baseline)	2012-02-03	30	0	No	20	0	No	30	0	Not listed	Not listed	Not listed	Not listed
64	Visit_two	Two	2012-12-21	30	0	No	30	0	No	30	0	Not listed	Not listed	Not listed	Not listed
64	Visit_three	Three	2013-12-20	40	0	Yes	40	4	Yes	40	4	Not listed	Not listed	Not listed	Not listed
65	Baseline	One(baseline)	2012-02-03	20	4	Yes	20	4	Yes	20	4	Not listed	Focal alone	Not listed	Listed but not started
65	Visit_two
65	Visit_three	Three	2014-03-27	30	4	Yes	30	4	Yes	30	4	Focal alone	Focal alone	Listed but not started	Listed but not started
66	Baseline	One(baseline)	2012-02-03	60	4	Yes	50	4	Yes	60	4	PRP + focal	PRP + grid	Completed course	Completed course
66	Visit_two	Two	2013-03-08	50	4	Yes	50	4	Yes	50	4	Not listed	Grid alone	Not listed	Completed course
66	Visit_three	Three	2014-01-13	30	4	Yes	30	4	Yes	30	4	PRP alone	PRP + grid	Completed course	Completed course
67	Baseline	One(baseline)	2012-02-07	60	1	Yes	70	0	Yes	70	1	PRP alone	PRP alone	Completed course	Completed course
67	Visit_two
68	Baseline	One(baseline)	2012-02-07	10	0	No	10	0	No	10	0	Not listed	Not listed	Not listed	Not listed
68	Visit_two	Two	2013-01-14	10	0	No	10	0	No	10	0	Not listed	Not listed	Not listed	Not listed
68	Visit_three	Three	2014-01-06	10	0	No	10	0	No	10	0	Not listed	Not listed	Not listed	Not listed
69	Baseline	One(baseline)	2012-02-07	20	4	Yes	30	4	Yes	30	4	PRP + grid	PRP + grid	Listed but not started	Listed but not started
69	Visit_two	Two	2013-01-04	20	4	Yes	20	4	Yes	20	4	Not listed	Grid alone	Not listed	Completed course
69	Visit_three	Three	2013-12-16	20	4	Yes	20	4	Yes	20	4	Not listed	Grid alone	Not listed	Completed course
70	Baseline	One(baseline)	2012-02-07	40	3	Yes	40	4	Yes	40	4	PRP alone	PRP + grid	Completed course	Completed course
70	Visit_two	Two	2013-01-04	30	4	Yes	30	2	No	30	4	Not listed	Not listed	Not listed	Not listed
70	Visit_three	Three	2014-02-25	40	0	Yes	60	4	Yes	60	4	PRP alone	PRP + focal	Completed course	Completed course
71	Baseline	One(baseline)	2012-02-07	10	0	No	10	0	No	10	0	Not listed	Not listed	Not listed	Not listed
71	Visit_two
72	Baseline	One(baseline)	2012-02-07	10	0	No	10	0	No	10	0	Not listed	Not listed	Not listed	Not listed
72	Visit_two	Two	2013-02-15	10	0	No	10	0	No	10	0	Not listed	Not listed	Not listed	Not listed
72	Visit_three	Three	2014-01-07	20	0	No	10	0	No	20	0	Not listed	Not listed	Not listed	Not listed
73	Baseline	One(baseline)	2012-02-09	20	0	No	20	0	No	20	0	Not listed	Not listed	Not listed	Not listed
73	Visit_two	Two	2013-01-03	10	0	No	10	0	No	10	0	Not listed	Not listed	Not listed	Not listed
73	Visit_three	Three	2013-12-19	10	0	No	10	0	No	10	0	Not listed	Not listed	Not listed	Not listed
74	Baseline	One(baseline)	2012-02-09	10	0	No	10	0	No	10	0	Not listed	Not listed	Not listed	Not listed
74	Visit_two
75	Baseline	One(baseline)	2012-02-09	10	0	No	10	0	No	10	0	Not listed	Not listed	Not listed	Not listed
75	Visit_two	Two	2013-03-28	10	0	No	10	0	No	10	0	Not listed	Not listed	Not listed	Not listed
75	Visit_three	Three	2014-04-03	10	0	No	10	0	No	10	0	Not listed	Not listed	Not listed	Not listed
76	Baseline	One(baseline)	2012-02-09	10	0	No	10	0	No	10	0	Not listed	Not listed	Not listed	Not listed
76	Visit_two	Two	2013-02-28	30	0	No	30	0	No	30	0	Not listed	Not listed	Not listed	Not listed
76	Visit_three	Three	2014-02-13	10	0	No	10	0	No	10	0	Not listed	Not listed	Not listed	Not listed
77	Baseline	One(baseline)	2012-02-09	10	0	No	10	0	No	10	0	Not listed	Not listed	Not listed	Not listed
77	Visit_two	Two	2013-02-28	10	0	No	10	0	No	10	0	Not listed	Not listed	Not listed	Not listed
77	Visit_three	Three	2013-12-19	10	0	No	10	0	No	10	0	Not listed	Not listed	Not listed	Not listed
78	Baseline	One(baseline)	2012-02-10	10	0	No	10	0	No	10	0	Not listed	Not listed	Not listed	Not listed
78	Visit_two	Two	2013-01-07	10	0	No	10	0	No	10	0	Not listed	Not listed	Not listed	Not listed
78	Visit_three	Three	2013-12-20	10	0	No	20	0	No	20	0	Not listed	Not listed	Not listed	Not listed
79	Baseline	One(baseline)	2012-02-10	10	0	No	10	0	No	10	0	Not listed	Not listed	Not listed	Not listed
79	Visit_two	Two	2013-01-04	10	0	No	10	0	No	10	0	Not listed	Not listed	Not listed	Not listed
79	Visit_three	Three	2014-01-31	10	0	No	10	0	No	10	0	Not listed	Not listed	Not listed	Not listed
80	Baseline	One(baseline)	2012-02-10	40	4	Yes	40	4	Yes	40	4	Not listed	Focal alone	Not listed	Completed course
80	Visit_two	Two	2013-01-07	40	4	Yes	20	4	Yes	40	4	Not listed	Focal alone	Not listed	Completed course
80	Visit_three	Three	2013-12-20	20	4	Yes	20	0	No	20	4	Not listed	Not listed	Not listed	Not listed
81	Baseline	One(baseline)	2012-02-10	10	0	No	10	0	No	10	0	Not listed	Not listed	Not listed	Not listed
81	Visit_two	Two	2013-01-07	10	0	No	10	0	No	10	0	Not listed	Not listed	Not listed	Not listed
81	Visit_three	Three	2014-01-10	20	4	Yes	40	0	Yes	40	4	Not listed	Not listed	Not listed	Not listed
82	Baseline	One(baseline)	2012-02-10	10	0	No	10	0	No	10	0	Not listed	Not listed	Not listed	Not listed
82	Visit_two	Two	2013-01-07	10	0	No	10	0	No	10	0	Not listed	Not listed	Not listed	Not listed
82	Visit_three	Three	2014-01-06	10	0	No	10	0	No	10	0	Not listed	Not listed	Not listed	Not listed
83	Baseline	One(baseline)	2012-02-10	20	0	No	20	0	No	20	0	Not listed	Not listed	Not listed	Not listed
83	Visit_two	Two	2013-01-07	20	0	No	20	0	No	20	0	Not listed	Not listed	Not listed	Not listed
83	Visit_three	Three	2014-01-13	20	0	No	20	0	No	20	0	Not listed	Not listed	Not listed	Not listed
84	Baseline	One(baseline)	2012-02-14	10	0	No	10	0	No	10	0	Not listed	Not listed	Not listed	Not listed
84	Visit_two	Two	2013-01-07	10	0	No	10	0	No	10	0	Not listed	Not listed	Not listed	Not listed
84	Visit_three	Three	2014-03-28	10	0	No	20	4	Yes	20	4	Not listed	Focal alone	Not listed	Listed but not started
85	Baseline	One(baseline)	2012-02-14	10	0	No	10	0	No	10	0	Not listed	Not listed	Not listed	Not listed
85	Visit_two	Two	2013-03-01	10	0	No	10	0	No	10	0	Not listed	Not listed	Not listed	Not listed
86	Baseline	One(baseline)	2012-02-14	20	0	No	10	0	No	20	0	Not listed	Not listed	Not listed	Not listed
86	Visit_two	Two	2013-01-07	20	0	No	20	0	No	20	0	Not listed	Not listed	Not listed	Not listed
86	Visit_three	Three	2014-01-13	20	0	No	10	0	No	20	0	Not listed	Not listed	Not listed	Not listed
87	Baseline	One(baseline)	2012-02-14	30	0	No	30	0	No	30	0	Not listed	Not listed	Not listed	Not listed
87	Visit_two	Two	2013-02-08	30	0	No	30	0	No	30	0	Not listed	Not listed	Not listed	Not listed
87	Visit_three	Three	2014-01-07	20	0	No	30	0	No	30	0	Not listed	Not listed	Not listed	Not listed
88	Baseline	One(baseline)	2012-02-14	10	0	No	10	0	No	10	0	Not listed	Not listed	Not listed	Not listed
88	Visit_two	Two	2013-01-07	10	0	No	10	0	No	10	0	Not listed	Not listed	Not listed	Not listed
88	Visit_three	Three	2014-01-06	10	0	No	10	0	No	10	0	Not listed	Not listed	Not listed	Not listed
89	Baseline	One(baseline)	2012-02-14	10	0	No	10	0	No	10	0	Not listed	Not listed	Not listed	Not listed
89	Visit_two
90	Baseline	One(baseline)	2012-02-16	20	4	Yes	20	4	Yes	20	4	Grid alone	Not listed	Completed course	Not listed
90	Visit_two	Two	2013-01-17	20	4	Yes	20	4	Yes	20	4	Not listed	Not listed	Not listed	Not listed
90	Visit_three	Three	2014-01-09	20	4	Yes	20	4	Yes	20	4	Not listed	Focal alone	Not listed	Completed course
91	Baseline	One(baseline)	2012-02-16	10	0	No	10	0	No	10	0	Not listed	Not listed	Not listed	Not listed
91	Visit_two	Two	2013-01-17	10	0	No	10	0	No	10	0	Not listed	Not listed	Not listed	Not listed
91	Visit_three	Three	2014-01-16	20	0	No	10	0	No	20	0	Not listed	Not listed	Not listed	Not listed
92	Baseline	One(baseline)	2012-02-16	10	0	No	20	4	Yes	20	4	Not listed	Not listed	Not listed	Not listed
92	Visit_two	Two	2013-04-18	10	0	No	10	0	No	10	0	Not listed	Not listed	Not listed	Not listed
92	Visit_three	Three	2013-12-19	10	0	No	10	0	No	10	0	Not listed	Not listed	Not listed	Not listed
93	Baseline	One(baseline)	2012-02-16	20	4	Yes	20	4	Yes	20	4	Not listed	Not listed	Not listed	Not listed
93	Visit_two	Two	2013-01-17	30	4	Yes	20	0	No	30	4	Not listed	Not listed	Not listed	Not listed
93	Visit_three	Three	2013-12-19	20	4	Yes	30	4	Yes	30	4	Not listed	Not listed	Not listed	Not listed
94	Baseline	One(baseline)	2012-02-16	10	0	No	10	0	No	10	0	Not listed	Not listed	Not listed	Not listed
94	Visit_two	Two	2013-01-17	10	0	No	10	0	No	10	0	Not listed	Not listed	Not listed	Not listed
94	Visit_three	Three	2014-01-09	10	0	No	10	0	No	10	0	Not listed	Not listed	Not listed	Not listed
95	Baseline	One(baseline)	2012-02-17	20	4	Yes	30	4	Yes	30	4	Not listed	Not listed	Not listed	Not listed
95	Visit_two	Two	2013-03-15	30	4	Yes	30	0	No	30	4	Not listed	Not listed	Not listed	Not listed
95	Visit_three	Three	2014-04-25	40	2	Yes	60	2	Yes	60	2	Not listed	PRP alone	Not listed	Completed course
96	Baseline	One(baseline)	2012-02-17	10	0	No	10	0	No	10	0	Not listed	Not listed	Not listed	Not listed
96	Visit_two	Two	2013-01-11	20	0	No	10	0	No	20	0	Not listed	Not listed	Not listed	Not listed
96	Visit_three	Three	2014-01-10	10	0	No	10	0	No	10	0	Not listed	Not listed	Not listed	Not listed
97	Visit_two	Two	2013-01-11	40	0	Yes	40	4	Yes	40	4	PRP alone	PRP alone	Completed course	Completed course
97	Baseline	One(baseline)	2012-02-17	20	4	Yes	30	4	Yes	30	4	Not listed	Grid alone	Not listed	Completed course
97	Visit_three	Three	2014-01-06	20	4	Yes	30	4	Yes	30	4	Not listed	Not listed	Not listed	Not listed
98	Baseline	One(baseline)	2012-02-17	20	0	No	10	0	No	20	0	Not listed	Not listed	Not listed	Not listed
98	Visit_two	Two	2012-12-21	20	0	No	10	0	No	20	0	Not listed	Not listed	Not listed	Not listed
98	Visit_three	Three	2014-01-06	20	4	Yes	20	4	Yes	20	4	Not listed	Not listed	Not listed	Not listed
99	Baseline	One(baseline)	2012-02-21	10	0	No	10	0	No	10	0	Not listed	Not listed	Not listed	Not listed
99	Visit_two	Two	2013-01-11	10	0	No	10	0	No	10	0	Not listed	Not listed	Not listed	Not listed
99	Visit_three	Three	2014-01-10	10	0	No	10	0	No	10	0	Not listed	Not listed	Not listed	Not listed
100	Baseline	One(baseline)	2012-02-21	60	4	Yes	40	4	Yes	60	4	PRP + grid	PRP + grid	Completed course	Completed course
100	Visit_two	Two	2013-01-11	70	4	Yes	40	4	Yes	70	4	PRP alone	PRP alone	Completed course	Completed course
100	Visit_three	Three	2014-01-06	20	4	Yes	20	0	No	20	4	PRP alone	PRP alone	Completed course	Completed course
101	Baseline	One(baseline)	2012-02-21	10	0	No	10	0	No	10	0	Not listed	Not listed	Not listed	Not listed
101	Visit_two	Two	2013-01-11	10	0	No	10	0	No	10	0	Not listed	Not listed	Not listed	Not listed
101	Visit_three	Three	2014-01-10	10	0	No	10	0	No	10	0	Not listed	Not listed	Not listed	Not listed
102	Baseline	One(baseline)	2012-02-21	20	0	No	20	0	No	20	0	Not listed	Not listed	Not listed	Not listed
102	Visit_two	Two	2013-01-11	20	0	No	20	0	No	20	0	Not listed	Not listed	Not listed	Not listed
102	Visit_three	Three	2014-01-10	20	0	No	20	0	No	20	0	Not listed	Not listed	Not listed	Not listed
103	Baseline	One(baseline)	2012-02-21	10	0	No	10	0	No	10	0	Not listed	Not listed	Not listed	Not listed
103	Visit_two	Two	2013-05-03	10	0	No	10	0	No	10	0	Not listed	Not listed	Not listed	Not listed
103	Visit_three	Three	2014-01-10	10	0	No	10	0	No	10	0	Not listed	Not listed	Not listed	Not listed
104	Baseline	One(baseline)	2012-02-21	10	0	No	10	0	No	10	0	Not listed	Not listed	Not listed	Not listed
104	Visit_two	Two	2013-01-14	10	0	No	10	0	No	10	0	Not listed	Not listed	Not listed	Not listed
104	Visit_three	Three	2014-01-28	10	0	No	10	0	No	10	0	Not listed	Not listed	Not listed	Not listed
105	Baseline	One(baseline)	2012-02-21	10	0	No	10	0	No	10	0	Not listed	Not listed	Not listed	Not listed
105	Visit_two
106	Baseline	One(baseline)	2012-02-23	10	0	No	10	0	No	10	0	Not listed	Not listed	Not listed	Not listed
106	Visit_two
107	Baseline	One(baseline)	2012-02-23	10	0	No	20	4	Yes	20	4	Not listed	Not listed	Not listed	Not listed
107	Visit_two	Two	2013-01-31	10	0	No	20	4	Yes	20	4	Not listed	Not listed	Not listed	Not listed
107	Visit_three	Three	2014-01-09	10	0	No	20	4	Yes	20	4	Not listed	Not listed	Not listed	Not listed
108	Baseline	One(baseline)	2012-02-23	10	0	No	10	0	No	10	0	Not listed	Not listed	Not listed	Not listed
108	Visit_two	Two	2013-05-16	10	0	No	10	0	No	10	0	Not listed	Not listed	Not listed	Not listed
108	Visit_three	Three	2014-01-30	20	0	No	10	0	No	20	0	Not listed	Not listed	Not listed	Not listed
109	Baseline	One(baseline)	2012-02-23	40	0	Yes	30	4	Yes	40	4	Not listed	Not listed	Not listed	Not listed
109	Visit_two	Two	2013-01-31	40	4	Yes	40	4	Yes	40	4	PRP alone	Not listed	Completed course	Not listed
109	Visit_three	Three	2014-01-09	20	4	Yes	20	3	Yes	20	4	PRP + focal	PRP alone	Completed course	Completed course
110	Baseline	One(baseline)	2012-02-23	10	0	No	10	0	No	10	0	Not listed	Not listed	Not listed	Not listed
110	Visit_two	Two	2013-05-16	10	0	No	10	0	No	10	0	Not listed	Not listed	Not listed	Not listed
110	Visit_three	Three	2014-02-20	30	0	No	10	0	No	30	0	Not listed	Not listed	Not listed	Not listed
111	Baseline	One(baseline)	2012-02-23	10	0	No	10	0	No	10	0	Not listed	Not listed	Not listed	Not listed
111	Visit_two	Two	2013-01-17	10	0	No	10	0	No	10	0	Not listed	Not listed	Not listed	Not listed
111	Visit_three	Three	2014-01-09	10	0	No	20	0	No	20	0	Not listed	Not listed	Not listed	Not listed
112	Visit_two	Two	2013-01-17	40	0	Yes	30	2	No	40	2	Not listed	Not listed	Not listed	Not listed
112	Baseline	One(baseline)	2012-02-23	20	0	No	10	0	No	20	0	Not listed	Not listed	Not listed	Not listed
112	Visit_three	Three	2014-01-09	30	2	No	40	0	Yes	40	2	Not listed	Not listed	Not listed	Not listed
113	Baseline	One(baseline)	2012-02-24	10	0	No	10	0	No	10	0	Not listed	Not listed	Not listed	Not listed
113	Visit_two	Two	2013-03-08	10	0	No	10	0	No	10	0	Not listed	Not listed	Not listed	Not listed
113	Visit_three	Three	2014-03-27	20	2	No	10	0	No	20	2	Not listed	Not listed	Not listed	Not listed
114	Baseline	One(baseline)	2012-02-24	10	0	No	10	0	No	10	0	Not listed	Not listed	Not listed	Not listed
114	Visit_two	Two	2013-01-14	10	0	No	10	0	No	10	0	Not listed	Not listed	Not listed	Not listed
114	Visit_three	Three	2014-01-10	10	0	No	10	0	No	10	0	Not listed	Not listed	Not listed	Not listed
115	Baseline	One(baseline)	2012-02-24	10	0	No	10	0	No	10	0	Not listed	Not listed	Not listed	Not listed
115	Visit_two	Two	2013-02-08	30	0	No	10	0	No	30	0	Not listed	Not listed	Not listed	Not listed
115	Visit_three	Three	2014-01-10	10	0	No	10	0	No	10	0	Not listed	Not listed	Not listed	Not listed
116	Baseline	One(baseline)	2012-02-24	10	0	No	10	0	No	10	0	Not listed	Not listed	Not listed	Not listed
116	Visit_two	Two	2013-01-28	10	0	No	10	0	No	10	0	Not listed	Not listed	Not listed	Not listed
116	Visit_three	Three	2014-01-17	10	0	No	10	0	No	10	0	Not listed	Not listed	Not listed	Not listed
117	Baseline	One(baseline)	2012-02-24	10	0	No	10	0	No	10	0	Not listed	Not listed	Not listed	Not listed
117	Visit_two	Two	2013-01-14	10	0	No	10	0	No	10	0	Not listed	Not listed	Not listed	Not listed
118	Baseline	One(baseline)	2012-02-24	20	0	No	20	0	No	20	0	Not listed	Not listed	Not listed	Not listed
118	Visit_two	Two	2013-01-14	10	0	No	10	0	No	10	0	Not listed	Not listed	Not listed	Not listed
118	Visit_three	Three	2014-01-10	10	0	No	10	0	No	10	0	Not listed	Not listed	Not listed	Not listed
119	Baseline	One(baseline)	2012-02-24	10	0	No	10	0	No	10	0	Not listed	Not listed	Not listed	Not listed
119	Visit_two	Two	2013-01-14	10	0	No	10	0	No	10	0	Not listed	Not listed	Not listed	Not listed
119	Visit_three	Three	2014-02-21	10	0	No	10	0	No	10	0	Not listed	Not listed	Not listed	Not listed
120	Baseline	One(baseline)	2012-02-28	10	0	No	10	0	No	10	0	Not listed	Not listed	Not listed	Not listed
120	Visit_two	Two	2013-01-14	10	0	No	10	0	No	10	0	Not listed	Not listed	Not listed	Not listed
120	Visit_three	Three	2014-01-17	10	0	No	10	0	No	10	0	Not listed	Not listed	Not listed	Not listed
121	Baseline	One(baseline)	2012-02-28	10	0	No	10	0	No	10	0	Not listed	Not listed	Not listed	Not listed
121	Visit_two	Two	2013-01-18	10	0	No	10	0	No	10	0	Not listed	Not listed	Not listed	Not listed
121	Visit_three	Three	2014-01-17	20	0	No	20	0	No	20	0	Not listed	Not listed	Not listed	Not listed
122	Baseline	One(baseline)	2012-02-28	10	0	No	10	0	No	10	0	Not listed	Not listed	Not listed	Not listed
122	Visit_two	Two	2013-02-08	10	0	No	10	0	No	10	0	Not listed	Not listed	Not listed	Not listed
122	Visit_three	Three	2014-02-25	10	0	No	30	0	No	30	0	Not listed	Not listed	Not listed	Not listed
123	Baseline	One(baseline)	2012-02-28	10	0	No	10	0	No	10	0	Not listed	Not listed	Not listed	Not listed
123	Visit_two	Two	2013-03-22	10	0	No	10	0	No	10	0	Not listed	Not listed	Not listed	Not listed
123	Visit_three	Three	2014-02-25	10	0	No	10	0	No	10	0	Not listed	Not listed	Not listed	Not listed
124	Baseline	One(baseline)	2012-02-28	10	0	No	10	0	No	10	0	Not listed	Not listed	Not listed	Not listed
124	Visit_two	Two	2013-01-18	10	0	No	10	0	No	10	0	Not listed	Not listed	Not listed	Not listed
124	Visit_three	Three	2014-02-21	20	0	No	20	0	No	20	0	Not listed	Not listed	Not listed	Not listed
125	Baseline	One(baseline)	2012-02-28	10	0	No	10	0	No	10	0	Not listed	Not listed	Not listed	Not listed
125	Visit_two
126	Baseline	One(baseline)	2012-02-28	10	0	No	10	0	No	10	0	Not listed	Not listed	Not listed	Not listed
126	Visit_two
126	Visit_three	Three	2014-05-09	10	0	No	10	0	No	10	0	Not listed	Not listed	Not listed	Not listed
127	Baseline	One(baseline)	2012-03-01	40	4	Yes	50	4	Yes	50	4	PRP alone	PRP alone	Completed course	Completed course
127	Visit_two	Two	2013-01-17	30	3	Yes	20	4	Yes	30	4	Not listed	PRP alone	Not listed	Completed course
127	Visit_three	Three	2014-01-09	40	4	Yes	20	4	Yes	40	4	Not listed	Not listed	Not listed	Not listed
128	Baseline	One(baseline)	2012-03-01	10	0	No	10	0	No	10	0	Not listed	Not listed	Not listed	Not listed
128	Visit_two
129	Baseline	One(baseline)	2012-03-01	20	0	No	10	0	No	20	0	Not listed	Not listed	Not listed	Not listed
129	Visit_two	Two	2013-04-18	20	0	No	20	0	No	20	0	Not listed	Not listed	Not listed	Not listed
130	Visit_two	Two	2013-01-31	30	4	Yes	40	0	Yes	40	4	Not listed	Not listed	Not listed	Not listed
130	Baseline	One(baseline)	2012-03-01	30	4	Yes	20	4	Yes	30	4	Focal alone	Not listed	Completed course	Not listed
130	Visit_three	Three	2014-03-13	40	4	Yes	40	0	Yes	40	4	Not listed	Not listed	Not listed	Not listed
131	Baseline	One(baseline)	2012-03-02	30	0	No	20	4	Yes	30	4	Not listed	Not listed	Not listed	Not listed
131	Visit_two	Two	2013-01-18	20	0	No	20	2	No	20	2	Not listed	Not listed	Not listed	Not listed
131	Visit_three	Three	2014-02-25	20	0	No	20	4	Yes	20	4	Not listed	Not listed	Not listed	Not listed
132	Baseline	One(baseline)	2012-03-02	10	0	No	10	0	No	10	0	Not listed	Not listed	Not listed	Not listed
132	Visit_two	Two	2013-01-18	10	0	No	10	0	No	10	0	Not listed	Not listed	Not listed	Not listed
132	Visit_three	Three	2014-02-21	10	0	No	10	0	No	10	0	Not listed	Not listed	Not listed	Not listed
133	Baseline	One(baseline)	2012-03-02	10	0	No	10	0	No	10	0	Not listed	Not listed	Not listed	Not listed
133	Visit_two	Two	2013-01-18	10	0	No	10	0	No	10	0	Not listed	Not listed	Not listed	Not listed
133	Visit_three	Three	2014-01-24	20	0	No	10	0	No	20	0	Not listed	Not listed	Not listed	Not listed
134	Baseline	One(baseline)	2012-03-02	40	4	Yes	20	0	No	40	4	Not listed	Not listed	Not listed	Not listed
134	Visit_two
135	Baseline	One(baseline)	2012-03-02	40	4	Yes	40	4	Yes	40	4	PRP + grid	PRP + grid	Listed but not started	Listed but not started
135	Visit_two	Two	2013-01-18	20	4	Yes	30	4	Yes	30	4	PRP + grid	PRP + grid	Completed course	Completed course
135	Visit_three	Three	2014-01-20	40	4	Yes	40	4	Yes	40	4	Not listed	Focal alone	Not listed	Completed course
136	Baseline	One(baseline)	2012-03-02	10	0	No	10	0	No	10	0	Not listed	Not listed	Not listed	Not listed
136	Visit_two	Two	2013-01-21	10	0	No	10	0	No	10	0	Not listed	Not listed	Not listed	Not listed
136	Visit_three	Three	2014-01-20	10	0	No	10	0	No	10	0	Not listed	Not listed	Not listed	Not listed
137	Baseline	One(baseline)	2012-03-02	10	0	No	10	0	No	10	0	Not listed	Not listed	Not listed	Not listed
137	Visit_two	Two	2013-04-12	10	0	No	10	0	No	10	0	Not listed	Not listed	Not listed	Not listed
137	Visit_three	Three	2014-01-28	10	0	No	10	0	No	10	0	Not listed	Not listed	Not listed	Not listed
138	Baseline	One(baseline)	2012-03-02	20	0	No	20	0	No	20	0	Not listed	Not listed	Not listed	Not listed
138	Visit_two	Two	2013-01-18	20	0	No	30	0	No	30	0	Not listed	Not listed	Not listed	Not listed
139	Visit_two	Two	2013-01-18	40	4	Yes	40	4	Yes	40	4	PRP alone	PRP alone	Completed course	Completed course
139	Baseline	One(baseline)	2012-03-06	30	4	Yes	30	0	No	30	4	Not listed	Not listed	Not listed	Not listed
139	Visit_three	Three	2014-01-17	70	4	Yes	70	4	Yes	70	4	PRP + grid	PRP + grid	Completed course	Completed course
140	Baseline	One(baseline)	2012-03-06	10	0	No	10	0	No	10	0	Not listed	Not listed	Not listed	Not listed
140	Visit_two	Two	2013-01-18	30	0	No	20	0	No	30	0	Not listed	Not listed	Not listed	Not listed
140	Visit_three	Three	2014-01-20	20	2	No	20	4	Yes	20	4	Not listed	Not listed	Not listed	Not listed
141	Baseline	One(baseline)	2012-03-06	20	0	No	20	0	No	20	0	Not listed	Not listed	Not listed	Not listed
141	Visit_two	Two	2013-01-21	20	0	No	10	0	No	20	0	Not listed	Not listed	Not listed	Not listed
141	Visit_three	Three	2014-02-14	20	0	No	20	2	No	20	2	Not listed	Not listed	Not listed	Not listed
142	Baseline	One(baseline)	2012-03-06	70	90	Yes	71	90	Yes	71	90	PRP alone	Not listed	Completed course	Not listed
142	Visit_two	Two	2013-01-28	71	90	Yes	71	90	Yes	71	90	PRP alone	Not listed	Completed course	Not listed
143	Baseline	One(baseline)	2012-03-06	20	0	No	20	0	No	20	0	Not listed	Not listed	Not listed	Not listed
143	Visit_two	Two	2013-01-21	10	0	No	10	0	No	10	0	Not listed	Not listed	Not listed	Not listed
143	Visit_three	Three	2014-01-28	20	0	No	20	0	No	20	0	Not listed	Not listed	Not listed	Not listed
144	Baseline	One(baseline)	2012-03-06	20	0	No	20	0	No	20	0	Not listed	Not listed	Not listed	Not listed
144	Visit_two
145	Baseline	One(baseline)	2012-03-06	10	0	No	10	0	No	10	0	Not listed	Not listed	Not listed	Not listed
145	Visit_two	Two	2013-01-25	10	0	No	10	0	No	10	0	Not listed	Not listed	Not listed	Not listed
145	Visit_three	Three	2014-01-20	10	0	No	10	0	No	10	0	Not listed	Not listed	Not listed	Not listed
147	Baseline	One(baseline)	2012-03-08	10	0	No	10	0	No	10	0	Not listed	Not listed	Not listed	Not listed
147	Visit_two	Two	2013-03-28	10	0	No	10	0	No	10	0	Not listed	Not listed	Not listed	Not listed
147	Visit_three	Three	2014-01-16	20	0	No	10	0	No	20	0	Not listed	Not listed	Not listed	Not listed
148	Baseline	One(baseline)	2012-03-08	10	0	No	10	0	No	10	0	Not listed	Not listed	Not listed	Not listed
148	Visit_two	Two	2013-03-21	10	0	No	10	0	No	10	0	Not listed	Not listed	Not listed	Not listed
148	Visit_three	Three	2014-02-20	10	0	No	20	0	No	20	0	Not listed	Not listed	Not listed	Not listed
149	Baseline	One(baseline)	2012-03-08	20	0	No	10	0	No	20	0	Not listed	Not listed	Not listed	Not listed
149	Visit_two	Two	2013-03-28	20	0	No	10	0	No	20	0	Not listed	Not listed	Not listed	Not listed
149	Visit_three	Three	2014-01-16	20	0	No	10	0	No	20	0	Not listed	Not listed	Not listed	Not listed
151	Baseline	One(baseline)	2012-03-08	10	0	No	10	0	No	10	0	Not listed	Not listed	Not listed	Not listed
151	Visit_two	Two	2013-03-28	10	0	No	10	0	No	10	0	Not listed	Not listed	Not listed	Not listed
151	Visit_three	Three	2014-01-16	10	0	No	10	0	No	10	0	Not listed	Not listed	Not listed	Not listed
152	Baseline	One(baseline)	2012-03-09	10	0	No	10	0	No	10	0	Not listed	Not listed	Not listed	Not listed
152	Visit_two	Two	2013-03-08	10	0	No	10	0	No	10	0	Not listed	Not listed	Not listed	Not listed
152	Visit_three	Three	2014-02-18	10	0	No	10	0	No	10	0	Not listed	Not listed	Not listed	Not listed
153	Baseline	One(baseline)	2012-03-09	20	0	No	10	0	No	20	0	Not listed	Not listed	Not listed	Not listed
153	Visit_two	Two	2013-01-25	10	0	No	10	0	No	10	0	Not listed	Not listed	Not listed	Not listed
153	Visit_three	Three	2014-01-24	10	0	No	10	0	No	10	0	Not listed	Not listed	Not listed	Not listed
154	Baseline	One(baseline)	2012-03-09	10	0	No	10	0	No	10	0	Not listed	Not listed	Not listed	Not listed
154	Visit_two	Two	2013-01-25	10	0	No	10	0	No	10	0	Not listed	Not listed	Not listed	Not listed
154	Visit_three	Three	2014-01-24	10	0	No	10	0	No	10	0	Not listed	Not listed	Not listed	Not listed
155	Baseline	One(baseline)	2012-03-09	30	4	Yes	30	4	Yes	30	4	Not listed	Not listed	Not listed	Not listed
155	Visit_two	Two	2013-03-08	30	4	Yes	20	4	Yes	30	4	Focal alone	Focal alone	Completed course	Completed course
155	Visit_three	Three	2014-03-27	40	4	Yes	30	4	Yes	40	4	Not listed	Focal alone	Not listed	Completed course
156	Baseline	One(baseline)	2012-03-09	10	0	No	10	0	No	10	0	Not listed	Not listed	Not listed	Not listed
156	Visit_two	Two	2013-01-25	10	0	No	10	0	No	10	0	Not listed	Not listed	Not listed	Not listed
156	Visit_three	Three	2014-02-21	10	0	No	10	0	No	10	0	Not listed	Not listed	Not listed	Not listed
157	Baseline	One(baseline)	2012-03-09	10	0	No	10	0	No	10	0	Not listed	Not listed	Not listed	Not listed
157	Visit_two	Two	2013-03-08	90	90		90	90		90	90	Not listed	Not listed	Not listed	Not listed
157	Visit_three	Three	2014-01-28	90	90		90	90		90	90	Not listed	Not listed	Not listed	Not listed
158	Baseline	One(baseline)	2012-03-09	10	0	No	10	0	No	10	0	Not listed	Not listed	Not listed	Not listed
158	Visit_two	Two	2013-01-25	10	0	No	10	0	No	10	0	Not listed	Not listed	Not listed	Not listed
158	Visit_three	Three	2014-01-24	10	0	No	10	0	No	10	0	Not listed	Not listed	Not listed	Not listed
159	Baseline	One(baseline)	2012-03-09	10	0	No	20	0	No	20	0	Not listed	Not listed	Not listed	Not listed
159	Visit_three	Three	2014-04-04	20	0	No	30	0	No	30	0	Not listed	Not listed	Not listed	Not listed
160	Baseline	One(baseline)	2012-03-12	10	0	No	20	0	No	20	0	Not listed	Not listed	Not listed	Not listed
160	Visit_two	Two	2013-01-21	10	0	No	10	0	No	10	0	Not listed	Not listed	Not listed	Not listed
160	Visit_three	Three	2014-02-25	20	4	Yes	20	0	No	20	4	Not listed	Not listed	Not listed	Not listed
161	Baseline	One(baseline)	2012-03-12	10	0	No	10	0	No	10	0	Not listed	Not listed	Not listed	Not listed
161	Visit_two	Two	2013-01-25	10	0	No	10	0	No	10	0	Not listed	Not listed	Not listed	Not listed
161	Visit_three	Three	2014-01-24	10	0	No	10	0	No	10	0	Not listed	Not listed	Not listed	Not listed
162	Baseline	One(baseline)	2012-03-13	10	0	No	10	0	No	10	0	Not listed	Not listed	Not listed	Not listed
162	Visit_two	Two	2013-01-28	10	0	No	10	0	No	10	0	Not listed	Not listed	Not listed	Not listed
162	Visit_three	Three	2014-02-18	10	0	No	20	0	No	20	0	Not listed	Not listed	Not listed	Not listed
163	Visit_two	Two	2013-01-25	40	3	Yes	40	4	Yes	40	4	PRP alone	PRP + focal	Completed course	Completed course
163	Baseline	One(baseline)	2012-03-13	30	3	Yes	30	4	Yes	30	4	Not listed	Not listed	Not listed	Not listed
163	Visit_three	Three	2013-12-12	50	4	Yes	50	4	Yes	50	4	Not listed	Not listed	Not listed	Not listed
164	Baseline	One(baseline)	2012-03-13	10	0	No	10	0	No	10	0	Not listed	Not listed	Not listed	Not listed
164	Visit_two	Two	2013-01-28	10	0	No	10	0	No	10	0	Not listed	Not listed	Not listed	Not listed
164	Visit_three	Three	2014-02-25	20	0	No	20	0	No	20	0	Not listed	Not listed	Not listed	Not listed
165	Baseline	One(baseline)	2012-03-13	20	0	No	10	0	No	20	0	Not listed	Not listed	Not listed	Not listed
165	Visit_two	Two	2013-02-01	20	3	Yes	20	0	No	20	3	Not listed	Not listed	Not listed	Not listed
165	Visit_three	Three	2014-04-01	40	4	Yes	20	4	Yes	40	4	Not listed	Not listed	Not listed	Not listed
166	Baseline	One(baseline)	2012-03-13	10	0	No	10	0	No	10	0	Not listed	Not listed	Not listed	Not listed
166	Visit_two	Two	2013-01-28	10	0	No	10	0	No	10	0	Not listed	Not listed	Not listed	Not listed
166	Visit_three	Three	2014-03-28	20	0	No	20	0	No	20	0	Not listed	Not listed	Not listed	Not listed
167	Baseline	One(baseline)	2012-03-13	10	0	No	10	0	No	10	0	Not listed	Not listed	Not listed	Not listed
167	Visit_two	Two	2013-01-28	10	0	No	10	0	No	10	0	Not listed	Not listed	Not listed	Not listed
167	Visit_three	Three	2014-01-24	20	0	No	20	0	No	20	0	Not listed	Not listed	Not listed	Not listed
168	Baseline	One(baseline)	2012-03-13	10	0	No	10	0	No	10	0	Not listed	Not listed	Not listed	Not listed
168	Visit_two	Two	2013-01-28	10	0	No	20	0	No	20	0	Not listed	Not listed	Not listed	Not listed
168	Visit_three	Three	2014-01-28	10	0	No	20	0	No	20	0	Not listed	Not listed	Not listed	Not listed
169	Baseline	One(baseline)	2012-03-13	10	0	No	10	0	No	10	0	Not listed	Not listed	Not listed	Not listed
169	Visit_two	Two	2013-01-28	10	0	No	10	0	No	10	0	Not listed	Not listed	Not listed	Not listed
169	Visit_three	Three	2014-03-27	10	0	No	10	0	No	10	0	Not listed	Not listed	Not listed	Not listed
170	Baseline	One(baseline)	2012-03-15	10	0	No	10	0	No	10	0	Not listed	Not listed	Not listed	Not listed
170	Visit_two	Two	2013-06-06	10	0	No	10	0	No	10	0	Not listed	Not listed	Not listed	Not listed
170	Visit_three	Three	2014-01-30	10	0	No	10	0	No	10	0	Not listed	Not listed	Not listed	Not listed
171	Baseline	One(baseline)	2012-03-15	50	0	Yes	50	0	Yes	50	0	PRP alone	PRP alone	Completed course	Completed course
171	Visit_two	Two	2013-01-31	20	0	No	20	0	No	20	0	Not listed	Not listed	Not listed	Not listed
171	Visit_three	Three	2014-02-27	20	0	No	20	0	No	20	0	Not listed	Not listed	Not listed	Not listed
172	Baseline	One(baseline)	2012-03-15	10	0	No	10	0	No	10	0	Not listed	Not listed	Not listed	Not listed
173	Baseline	One(baseline)	2012-03-15	50	2	Yes	60	2	Yes	60	2	PRP alone	PRP alone	Completed course	Completed course
173	Visit_two	Two	2013-03-28	60	2	Yes	60	4	Yes	60	4	PRP alone	PRP alone	Completed course	Completed course
173	Visit_three	Three	2014-01-23	50	2	Yes	50	2	Yes	50	2	Not listed	Not listed	Not listed	Not listed
174	Baseline	One(baseline)	2012-03-15	10	0	No	10	0	No	10	0	Not listed	Not listed	Not listed	Not listed
174	Visit_two	Two	2013-01-31	10	0	No	10	0	No	10	0	Not listed	Not listed	Not listed	Not listed
174	Visit_three	Three	2014-01-16	30	0	No	10	0	No	30	0	Not listed	Not listed	Not listed	Not listed
175	Baseline	One(baseline)	2012-03-15	10	0	No	10	0	No	10	0	Not listed	Not listed	Not listed	Not listed
175	Visit_two	Two	2013-01-31	10	0	No	10	0	No	10	0	Not listed	Not listed	Not listed	Not listed
175	Visit_three	Three	2014-01-16	10	0	No	10	0	No	10	0	Not listed	Not listed	Not listed	Not listed
176	Baseline	One(baseline)	2012-03-15	10	0	No	10	0	No	10	0	Not listed	Not listed	Not listed	Not listed
176	Visit_two	Two	2013-03-28	20	0	No	10	0	No	20	0	Not listed	Not listed	Not listed	Not listed
177	Baseline	One(baseline)	2012-03-15	20	0	No	20	3	Yes	20	3	Not listed	Not listed	Not listed	Not listed
178	Baseline	One(baseline)	2012-03-15	10	0	No	10	0	No	10	0	Not listed	Not listed	Not listed	Not listed
179	Baseline	One(baseline)	2012-03-16	10	0	No	10	0	No	10	0	Not listed	Not listed	Not listed	Not listed
179	Visit_two	Two	2013-02-01	10	0	No	10	0	No	10	0	Not listed	Not listed	Not listed	Not listed
179	Visit_three	Three	2014-03-28	10	0	No	10	0	No	10	0	Not listed	Not listed	Not listed	Not listed
180	Baseline	One(baseline)	2012-03-16	10	0	No	10	0	No	10	0	Not listed	Not listed	Not listed	Not listed
180	Visit_two	Two	2013-02-15	10	0	No	10	0	No	10	0	Not listed	Not listed	Not listed	Not listed
180	Visit_three	Three	2014-02-14	20	0	No	10	0	No	20	0	Not listed	Not listed	Not listed	Not listed
181	Baseline	One(baseline)	2012-03-16	10	0	No	10	0	No	10	0	Not listed	Not listed	Not listed	Not listed
181	Visit_two	Two	2013-02-18	10	0	No	10	0	No	10	0	Not listed	Not listed	Not listed	Not listed
181	Visit_three	Three	2014-02-14	10	0	No	10	0	No	10	0	Not listed	Not listed	Not listed	Not listed
182	Baseline	One(baseline)	2012-03-16	10	0	No	10	0	No	10	0	Not listed	Not listed	Not listed	Not listed
182	Visit_two	Two	2013-02-01	10	0	No	10	0	No	10	0	Not listed	Not listed	Not listed	Not listed
182	Visit_three	Three	2014-02-14	10	0	No	10	0	No	10	0	Not listed	Not listed	Not listed	Not listed
184	Baseline	One(baseline)	2012-03-16	50	4	Yes	70	90	Yes	70	4	Not listed	PRP alone	Not listed	Completed course
184	Visit_two	Two	2013-02-01	40	4	Yes	71	90	Yes	71	4	Not listed	PRP alone	Not listed	Completed course
184	Visit_three	Three	2014-02-14	20	4	Yes	72	90	Yes	72	4	Focal alone	Not listed	Completed course	Not listed
185	Baseline	One(baseline)	2012-03-16	20	3	Yes	20	0	No	20	3	Not listed	Not listed	Not listed	Not listed
185	Visit_two	Two	2013-04-12	20	0	No	30	0	No	30	0	Not listed	Not listed	Not listed	Not listed
185	Visit_three	Three	2014-03-04	20	0	No	30	0	No	30	0	PRP alone	Not listed	Started but not completed	Not listed
186	Baseline	One(baseline)	2012-03-16	10	0	No	10	0	No	10	0	Not listed	Not listed	Not listed	Not listed
186	Visit_two	Two	2013-03-15	10	0	No	10	0	No	10	0	Not listed	Not listed	Not listed	Not listed
186	Visit_three	Three	2014-03-27	10	0	No	10	0	No	10	0	Not listed	Not listed	Not listed	Not listed
187	Baseline	One(baseline)	2012-03-19	40	4	Yes	30	4	Yes	40	4	Not listed	Not listed	Not listed	Not listed
187	Visit_two	Two	2013-02-01	40	4	Yes	40	4	Yes	40	4	PRP + focal	PRP alone	Completed course	Completed course
187	Visit_three	Three	2014-02-25	50	4	Yes	50	4	Yes	50	4	PRP + focal	PRP + focal	Listed but not started	Listed but not started
188	Baseline	One(baseline)	2012-03-19	10	0	No	10	0	No	10	0	Not listed	Not listed	Not listed	Not listed
188	Visit_two	Two	2013-03-15	10	0	No	10	0	No	10	0	Not listed	Not listed	Not listed	Not listed
188	Visit_three	Three	2014-01-31	10	0	No	10	0	No	10	0	Not listed	Not listed	Not listed	Not listed
189	Baseline	One(baseline)	2012-03-19	10	0	No	10	0	No	10	0	Not listed	Not listed	Not listed	Not listed
189	Visit_two	Two	2013-02-01	20	0	No	10	0	No	20	0	Not listed	Not listed	Not listed	Not listed
189	Visit_three	Three	2014-01-31	10	0	No	10	0	No	10	0	Not listed	Not listed	Not listed	Not listed
190	Baseline	One(baseline)	2012-03-20	20	3	Yes	20	4	Yes	20	4	Not listed	Not listed	Not listed	Not listed
190	Visit_two	Two	2013-02-01	20	3	Yes	20	4	Yes	20	4	Not listed	Not listed	Not listed	Not listed
190	Visit_three	Three	2014-02-18	20	4	Yes	30	4	Yes	30	4	Not listed	Not listed	Not listed	Not listed
191	Baseline	One(baseline)	2012-03-20	20	0	No	20	2	No	20	2	Not listed	Not listed	Not listed	Not listed
191	Visit_two	Two	2013-02-01	20	3	Yes	20	0	No	20	3	Not listed	Not listed	Not listed	Not listed
191	Visit_three	Three	2014-02-18	20	0	No	20	2	No	20	2	Not listed	Not listed	Not listed	Not listed
192	Baseline	One(baseline)	2012-03-20	10	0	No	10	0	No	10	0	Not listed	Not listed	Not listed	Not listed
192	Visit_two	Two	2013-03-08	10	0	No	10	0	No	10	0	Not listed	Not listed	Not listed	Not listed
192	Visit_three	Three	2014-03-27	10	0	No	10	0	No	10	0	Not listed	Not listed	Not listed	Not listed
193	Baseline	One(baseline)	2012-03-20	20	0	No	20	0	No	20	0	Not listed	Not listed	Not listed	Not listed
193	Visit_two	Two	2013-02-01	20	4	Yes	20	0	No	20	4	Not listed	Not listed	Not listed	Not listed
193	Visit_three	Three	2014-02-14	20	0	No	20	0	No	20	0	Not listed	Not listed	Not listed	Not listed
194	Baseline	One(baseline)	2012-03-20	10	0	No	20	0	No	20	0	Not listed	Not listed	Not listed	Not listed
194	Visit_two	Two	2013-02-01	10	0	No	10	0	No	10	0	Not listed	Not listed	Not listed	Not listed
194	Visit_three	Three	2014-04-15	10	0	No	10	0	No	10	0	Not listed	Not listed	Not listed	Not listed
195	Baseline	One(baseline)	2012-03-20	10	0	No	20	0	No	20	0	Not listed	Not listed	Not listed	Not listed
195	Visit_two	Two	2013-02-01	10	0	No	10	0	No	10	0	Not listed	Not listed	Not listed	Not listed
195	Visit_three	Three	2014-02-14	10	0	No	10	0	No	10	0	Not listed	Not listed	Not listed	Not listed
196	Baseline	One(baseline)	2012-03-20	20	4	Yes	30	4	Yes	30	4	Not listed	PRP alone	Not listed	Completed course
196	Visit_two	Two	2013-02-08	30	4	Yes	20	0	No	30	4	Not listed	Not listed	Not listed	Not listed
196	Visit_three	Three	2013-12-12	30	2	No	30	0	No	30	2	PRP alone	Not listed	Completed course	Not listed
197	Baseline	One(baseline)	2012-03-20	20	0	No	20	0	No	20	0	Not listed	Not listed	Not listed	Not listed
197	Visit_two	Two	2013-02-04	20	0	No	20	0	No	20	0	Not listed	Not listed	Not listed	Not listed
197	Visit_three	Three	2014-02-25	20	0	No	20	0	No	20	0	Not listed	Not listed	Not listed	Not listed
198	Baseline	One(baseline)	2012-03-20	20	0	No	20	0	No	20	0	Not listed	Not listed	Not listed	Not listed
198	Visit_two	Two	2013-03-22	20	0	No	20	0	No	20	0	Not listed	Not listed	Not listed	Not listed
198	Visit_three	Three	2013-12-10	20	0	No	20	0	No	20	0	Not listed	Not listed	Not listed	Not listed
199	Baseline	One(baseline)	2012-03-22	20	0	No	20	0	No	20	0	Not listed	Not listed	Not listed	Not listed
199	Visit_two	Two	2013-05-02	30	0	No	10	0	No	30	0	Not listed	Not listed	Not listed	Not listed
200	Baseline	One(baseline)	2012-03-22	10	0	No	10	0	No	10	0	Not listed	Not listed	Not listed	Not listed
200	Visit_two	Two	2013-04-18	10	0	No	10	0	No	10	0	Not listed	Not listed	Not listed	Not listed
201	Baseline	One(baseline)	2012-03-22	30	4	Yes	40	4	Yes	40	4	PRP + grid	Focal alone	Completed course	Completed course
201	Visit_two	Two	2013-03-07	30	4	Yes	30	4	Yes	30	4	Not listed	Not listed	Not listed	Not listed
201	Visit_three	Three	2014-02-13	40	4	Yes	40	4	Yes	40	4	Focal alone	PRP + focal	Listed but not started	Listed but not started
202	Baseline	One(baseline)	2012-03-22	20	0	No	10	0	No	20	0	Not listed	Not listed	Not listed	Not listed
202	Visit_two	Two	2013-04-18	30	2	No	30	0	No	30	2	Not listed	Not listed	Not listed	Not listed
202	Visit_three	Three	2014-02-13	30	3	Yes	30	0	No	30	3	Not listed	Not listed	Not listed	Not listed
203	Baseline	One(baseline)	2012-03-22	20	0	No	20	0	No	20	0	Not listed	Not listed	Not listed	Not listed
203	Visit_two	Two	2013-03-28	20	0	No	20	0	No	20	0	Not listed	Not listed	Not listed	Not listed
203	Visit_three	Three	2014-03-13	30	0	No	40	0	Yes	40	0	Not listed	Not listed	Not listed	Not listed
204	Baseline	One(baseline)	2012-03-22	10	0	No	10	0	No	10	0	Not listed	Not listed	Not listed	Not listed
204	Visit_two	Two	2013-01-31	10	0	No	10	0	No	10	0	Not listed	Not listed	Not listed	Not listed
204	Visit_three	Three	2014-01-23	10	0	No	10	0	No	10	0	Not listed	Not listed	Not listed	Not listed
205	Baseline	One(baseline)	2012-03-22	40	4	Yes	40	4	Yes	40	4	PRP + grid	PRP + grid	Completed course	Completed course
205	Visit_two	Two	2013-02-28	20	4	Yes	20	4	Yes	20	4	Not listed	Not listed	Not listed	Not listed
205	Visit_three	Three	2014-01-16	20	4	Yes	20	4	Yes	20	4	Focal alone	Focal alone	Completed course	Completed course
206	Baseline	One(baseline)	2012-03-23	30	4	Yes	40	4	Yes	40	4	PRP + focal	PRP + grid	Started but not completed	Started but not completed
206	Visit_two	Two	2013-03-25	20	3	Yes	30	4	Yes	30	4	PRP alone	PRP alone	Completed course	Completed course
206	Visit_three	Three	2014-04-08	40	3	Yes	40	4	Yes	40	4	Not listed	Grid alone	Not listed	Listed but not started
207	Baseline	One(baseline)	2012-03-23	30	0	No	10	0	No	30	0	Not listed	Not listed	Not listed	Not listed
207	Visit_two	Two	2013-04-12	20	0	No	20	0	No	20	0	Not listed	Not listed	Not listed	Not listed
207	Visit_three	Three	2014-03-28	20	0	No	10	0	No	20	0	Not listed	Not listed	Not listed	Not listed
208	Baseline	One(baseline)	2012-03-23	10	0	No	10	0	No	10	0	Not listed	Not listed	Not listed	Not listed
209	Baseline	One(baseline)	2012-03-23	10	0	No	10	0	No	10	0	Not listed	Not listed	Not listed	Not listed
209	Visit_two	Two	2013-03-15	10	0	No	10	0	No	10	0	Not listed	Not listed	Not listed	Not listed
209	Visit_three	Three	2014-03-25	10	0	No	10	0	No	10	0	Not listed	Not listed	Not listed	Not listed
210	Baseline	One(baseline)	2012-03-23	10	0	No	10	0	No	10	0	Not listed	Not listed	Not listed	Not listed
210	Visit_two	Two	2013-02-04	10	0	No	10	0	No	10	0	Not listed	Not listed	Not listed	Not listed
211	Baseline	One(baseline)	2012-03-23	10	0	No	10	0	No	10	0	Not listed	Not listed	Not listed	Not listed
211	Visit_two	Two	2013-03-22	10	0	No	10	0	No	10	0	Not listed	Not listed	Not listed	Not listed
211	Visit_three	Three	2013-12-17	10	0	No	10	0	No	10	0	Not listed	Not listed	Not listed	Not listed
212	Baseline	One(baseline)	2012-03-23	20	4	Yes	30	4	Yes	30	4	Focal alone	Focal alone	Completed course	Completed course
212	Visit_two	Two	2013-04-19	30	4	Yes	30	4	Yes	30	4	Not listed	Not listed	Not listed	Not listed
212	Visit_three	Three	2014-02-11	30	4	Yes	20	4	Yes	30	4	Focal alone	Not listed	Completed course	Not listed
213	Baseline	One(baseline)	2012-03-26	10	0	No	10	0	No	10	0	Not listed	Not listed	Not listed	Not listed
213	Visit_two	Two	2013-02-04	10	0	No	10	0	No	10	0	Not listed	Not listed	Not listed	Not listed
213	Visit_three	Three	2014-03-27	10	0	No	10	0	No	10	0	Not listed	Not listed	Not listed	Not listed
214	Baseline	One(baseline)	2012-03-26	10	0	No	10	0	No	10	0	Not listed	Not listed	Not listed	Not listed
215	Baseline	One(baseline)	2012-03-27	10	0	No	10	0	No	10	0	Not listed	Not listed	Not listed	Not listed
215	Visit_two	Two	2013-02-04	10	0	No	20	0	No	20	0	Not listed	Not listed	Not listed	Not listed
215	Visit_three	Three	2014-03-25	10	0	No	20	0	No	20	0	Not listed	Not listed	Not listed	Not listed
216	Baseline	One(baseline)	2012-03-27	20	0	No	20	0	No	20	0	Not listed	Not listed	Not listed	Not listed
216	Visit_two	Two	2013-02-04	20	0	No	10	0	No	20	0	Not listed	Not listed	Not listed	Not listed
216	Visit_three	Three	2014-03-25	20	0	No	20	0	No	20	0	Not listed	Not listed	Not listed	Not listed
217	Baseline	One(baseline)	2012-03-27	10	0	No	10	0	No	10	0	Not listed	Not listed	Not listed	Not listed
217	Visit_two	Two	2013-02-04	10	0	No	10	0	No	10	0	Not listed	Not listed	Not listed	Not listed
217	Visit_three	Three	2014-03-25	10	0	No	10	0	No	10	0	Not listed	Not listed	Not listed	Not listed
218	Baseline	One(baseline)	2012-03-27	60	4	Yes	40	0	Yes	60	4	PRP + grid	PRP + grid	Completed course	Completed course
218	Visit_two	Two	2013-02-08	20	4	Yes	20	4	Yes	20	4	Not listed	Focal alone	Not listed	Completed course
219	Baseline	One(baseline)	2012-03-27	10	0	No	10	0	No	10	0	Not listed	Not listed	Not listed	Not listed
219	Visit_two	Two	2013-03-15	10	0	No	10	0	No	10	0	Not listed	Not listed	Not listed	Not listed
219	Visit_three	Three	2014-03-25	10	0	No	10	0	No	10	0	Not listed	Not listed	Not listed	Not listed
220	Baseline	One(baseline)	2012-03-27	10	0	No	10	0	No	10	0	Not listed	Not listed	Not listed	Not listed
220	Visit_two	Two	2013-03-15	10	0	No	10	0	No	10	0	Not listed	Not listed	Not listed	Not listed
220	Visit_three	Three	2014-04-01	10	0	No	10	0	No	10	0	Not listed	Not listed	Not listed	Not listed
221	Baseline	One(baseline)	2012-03-27	60	4	Yes	70	4	Yes	70	4	PRP + grid	PRP + grid	Completed course	Completed course
221	Visit_two	Two	2013-02-08	60	0	Yes	60	0	Yes	60	0	PRP + grid	PRP alone	Completed course	Completed course
221	Visit_three	Three	2014-04-01	71	4	Yes	71	4	Yes	71	4	Not listed	PRP alone	Not listed	Completed course
222	Baseline	One(baseline)	2012-03-27	30	4	Yes	20	4	Yes	30	4	Not listed	Not listed	Not listed	Not listed
222	Visit_two	Two	2013-02-08	30	1	No	30	4	Yes	30	4	Not listed	Focal alone	Not listed	Completed course
222	Visit_three	Three	2014-02-11	30	4	Yes	30	4	Yes	30	4	Focal alone	Not listed	Completed course	Not listed
223	Baseline	One(baseline)	2012-03-29	10	0	No	20	0	No	20	0	Not listed	Not listed	Not listed	Not listed
224	Baseline	One(baseline)	2012-03-29	20	0	No	10	0	No	20	0	Not listed	Not listed	Not listed	Not listed
224	Visit_two	Two	2013-02-28	20	0	No	10	0	No	20	0	Not listed	Not listed	Not listed	Not listed
224	Visit_three	Three	2014-01-23	20	0	No	20	0	No	20	0	Not listed	Not listed	Not listed	Not listed
226	Baseline	One(baseline)	2012-03-29	20	4	Yes	20	2	No	20	4	Not listed	Not listed	Not listed	Not listed
226	Visit_two	Two	2013-02-28	20	0	No	20	0	No	20	0	Not listed	Not listed	Not listed	Not listed
226	Visit_three	Three	2014-01-23	30	4	Yes	20	4	Yes	30	4	Not listed	Focal alone	Not listed	Completed course
227	Baseline	One(baseline)	2012-03-29	40	4	Yes	40	4	Yes	40	4	PRP alone	PRP + grid	Completed course	Completed course
227	Visit_three	Three	2014-01-30	50	4	Yes	60	4	Yes	60	4	PRP + focal	PRP + grid	Completed course	Completed course
228	Baseline	One(baseline)	2012-03-29	30	0	No	20	0	No	30	0	Not listed	Not listed	Not listed	Not listed
228	Visit_two	Two	2013-03-07	30	0	No	30	2	No	30	2	Not listed	Not listed	Not listed	Not listed
228	Visit_three	Three	2014-01-30	30	0	No	30	0	No	30	0	Not listed	Not listed	Not listed	Not listed
229	Baseline	One(baseline)	2012-03-29	10	0	No	10	0	No	10	0	Not listed	Not listed	Not listed	Not listed
229	Visit_two	Two	2013-02-28	10	0	No	10	0	No	10	0	Not listed	Not listed	Not listed	Not listed
229	Visit_three	Three	2014-01-30	10	0	No	10	0	No	10	0	Not listed	Not listed	Not listed	Not listed
230	Baseline	One(baseline)	2012-03-29	60	4	Yes	60	4	Yes	60	4	PRP + focal	PRP alone	Completed course	Completed course
230	Visit_two	Two	2013-02-28	70	4	Yes	60	4	Yes	70	4	PRP alone	PRP + focal	Completed course	Completed course
230	Visit_three	Three	2014-01-23	60	4	Yes	20	4	Yes	60	4	Not listed	Not listed	Not listed	Not listed
231	Baseline	One(baseline)	2012-03-30	10	0	No	10	0	No	10	0	Not listed	Not listed	Not listed	Not listed
231	Visit_two	Two	2013-04-19	20	0	No	20	0	No	20	0	Not listed	Not listed	Not listed	Not listed
231	Visit_three	Three	2014-03-28	10	0	No	10	0	No	10	0	Not listed	Not listed	Not listed	Not listed
232	Baseline	One(baseline)	2012-03-30	30	4	Yes	30	4	Yes	30	4	Grid alone	PRP + grid	Started but not completed	Started but not completed
233	Baseline	One(baseline)	2012-03-30	20	0	No	20	0	No	20	0	Not listed	Not listed	Not listed	Not listed
233	Visit_two	Two	2013-02-15	10	0	No	20	4	Yes	20	4	Not listed	Not listed	Not listed	Not listed
233	Visit_three	Three	2014-03-27	20	0	No	20	0	No	20	0	Not listed	Not listed	Not listed	Not listed
234	Baseline	One(baseline)	2012-03-30	60	4	Yes	20	0	No	60	4	PRP + grid	Not listed	Started but not completed	Not listed
234	Visit_two	Two	2013-02-15	60	4	Yes	20	0	No	60	4	PRP + grid	Not listed	Completed course	Not listed
234	Visit_three	Three	2013-12-17	40	4	Yes	30	0	No	40	4	Not listed	Not listed	Not listed	Not listed
235	Visit_two	Two	2013-03-14	20	0	No	40	0	Yes	40	0	Not listed	PRP alone	Not listed	Completed course
235	Baseline	One(baseline)	2012-03-30	30	0	No	30	4	Yes	30	4	PRP alone	Not listed	Completed course	Not listed
235	Visit_three	Three	2014-01-28	20	0	No	20	0	No	20	0	Not listed	Not listed	Not listed	Not listed
236	Baseline	One(baseline)	2012-03-30	20	0	No	10	0	No	20	0	Not listed	Not listed	Not listed	Not listed
236	Visit_two
237	Baseline	One(baseline)	2012-03-30	10	0	No	10	0	No	10	0	Not listed	Not listed	Not listed	Not listed
237	Visit_two	Two	2013-02-15	10	0	No	10	0	No	10	0	Not listed	Not listed	Not listed	Not listed
237	Visit_three	Three	2014-02-11	20	0	No	10	0	No	20	0	Not listed	Not listed	Not listed	Not listed
238	Baseline	One(baseline)	2012-04-02	30	4	Yes	30	4	Yes	30	4	Not listed	Not listed	Not listed	Not listed
238	Visit_two	Two	2013-01-28	30	4	Yes	30	4	Yes	30	4	Not listed	Not listed	Not listed	Not listed
238	Visit_three	Three	2014-02-11	40	4	Yes	30	4	Yes	40	4	Not listed	Focal alone	Not listed	Completed course
239	Visit_two	Two	2013-02-15	30	4	Yes	40	3	Yes	40	4	Not listed	PRP alone	Not listed	Completed course
239	Baseline	One(baseline)	2012-04-02	20	4	Yes	30	4	Yes	30	4	Not listed	Not listed	Not listed	Not listed
239	Visit_three	Three	2014-02-11	40	4	Yes	40	0	No	40	4	PRP alone	Not listed	Completed course	Not listed
240	Baseline	One(baseline)	2012-04-02	20	0	No	20	0	No	20	0	Not listed	Not listed	Not listed	Not listed
240	Visit_two	Two	2013-02-15	10	0	No	10	0	No	10	0	Not listed	Not listed	Not listed	Not listed
240	Visit_three	Three	2014-01-24	20	0	No	20	0	No	20	0	Not listed	Not listed	Not listed	Not listed
241	Baseline	One(baseline)	2012-04-02	10	0	No	10	0	No	10	0	Not listed	Not listed	Not listed	Not listed
241	Visit_two	Two	2013-02-18	10	0	No	10	0	No	10	0	Not listed	Not listed	Not listed	Not listed
241	Visit_three	Three	2014-02-11	20	0	No	10	0	No	20	0	Not listed	Not listed	Not listed	Not listed
242	Baseline	One(baseline)	2012-04-03	10	0	No	10	0	No	10	0	Not listed	Not listed	Not listed	Not listed
242	Visit_two	Two	2013-02-18	10	0	No	10	0	No	10	0	Not listed	Not listed	Not listed	Not listed
242	Visit_three	Three	2014-02-11	10	0	No	10	0	No	10	0	Not listed	Not listed	Not listed	Not listed
243	Baseline	One(baseline)	2012-04-03	10	0	Yes	10	0	No	10	0	Not listed	Not listed	Not listed	Not listed
243	Visit_two	Two	2013-03-15	10	0	Yes	20	0	No	20	0	Not listed	Not listed	Not listed	Not listed
243	Visit_three	Three	2014-02-07	10	0	Yes	20	3	Yes	20	3	Not listed	Not listed	Not listed	Not listed
244	Baseline	One(baseline)	2012-04-03	20	0	No	20	0	No	20	0	Not listed	Not listed	Not listed	Not listed
244	Visit_two	Two	2013-02-18	20	0	No	30	0	No	30	0	Not listed	Not listed	Not listed	Not listed
244	Visit_three	Three	2014-02-11	20	4	Yes	40	4	Yes	40	4	Not listed	Not listed	Not listed	Not listed
245	Baseline	One(baseline)	2012-04-03	70	4	Yes	60	4	Yes	71	4	PRP alone	PRP + grid	Completed course	Completed course
245	Visit_two	Two	2013-05-10	70	2	Yes	71	4	Yes	71	4	PRP alone	PRP alone	Completed course	Completed course
245	Visit_three	Three	2014-03-27	72	90	Yes	71	2	Yes	72	2	Not listed	Not listed	Not listed	Not listed
246	Baseline	One(baseline)	2012-04-03	10	0	No	10	0	No	10	0	Not listed	Not listed	Not listed	Not listed
246	Visit_two	Two	2013-02-18	10	0	No	10	0	No	10	0	Not listed	Not listed	Not listed	Not listed
246	Visit_three	Three	2014-02-11	10	0	No	10	0	No	10	0	Not listed	Not listed	Not listed	Not listed
247	Baseline	One(baseline)	2012-04-05	20	0	No	20	4	Yes	20	4	Not listed	Not listed	Not listed	Not listed
247	Visit_two	Two	2013-02-28	30	4	Yes	30	3	Yes	30	4	Not listed	Focal alone	Not listed	Completed course
247	Visit_three	Three	2014-01-23	40	4	Yes	40	4	Yes	40	4	Not listed	Not listed	Not listed	Not listed
248	Baseline	One(baseline)	2012-04-05	20	4	Yes	20	0	No	20	4	Not listed	Not listed	Not listed	Not listed
248	Visit_two	Two	2013-03-28	20	4	Yes	20	4	Yes	20	4	Not listed	Not listed	Not listed	Not listed
248	Visit_three	Three	2014-01-23	30	4	Yes	20	4	Yes	30	4	Focal alone	Not listed	Completed course	Not listed
249	Baseline	One(baseline)	2012-04-05	10	0	No	10	0	No	10	0	Not listed	Not listed	Not listed	Not listed
249	Visit_two	Two	2013-04-18	10	0	No	10	0	No	10	0	Not listed	Not listed	Not listed	Not listed
249	Visit_three	Three	2014-01-30	20	0	No	10	0	No	20	0	Not listed	Not listed	Not listed	Not listed
250	Baseline	One(baseline)	2012-04-05	60	2	Yes	50	90	Yes	60	2	PRP alone	PRP alone	Completed course	Listed but not started
251	Baseline	One(baseline)	2012-04-10	10	0	No	10	0	No	10	0	Not listed	Not listed	Not listed	Not listed
251	Visit_two	Two	2013-03-25	10	0	No	10	0	No	10	0	Not listed	Not listed	Not listed	Not listed
251	Visit_three	Three	2014-03-04	10	0	No	20	0	No	20	0	Not listed	Not listed	Not listed	Not listed
252	Baseline	One(baseline)	2012-04-10	40	4	Yes	60	2	Yes	60	4	PRP + focal	PRP alone	Completed course	Completed course
252	Visit_two	Two	2013-03-22	50	4	Yes	50	4	Yes	50	4	Not listed	Not listed	Not listed	Not listed
252	Visit_three	Three	2014-02-18	20	0	No	40	0	Yes	40	0	Not listed	Not listed	Not listed	Not listed
253	Visit_two	Two	2013-03-14	20	0	No	40	0	No	40	0	Not listed	PRP alone	Not listed	Completed course
253	Baseline	One(baseline)	2012-04-10	50	4	Yes	50	4	Yes	50	4	PRP + grid	PRP + grid	Completed course	Completed course
253	Visit_three	Three	2014-01-10	60	4	Yes	60	4	Yes	60	4	Not listed	Not listed	Not listed	Not listed
254	Baseline	One(baseline)	2012-04-10	10	0	No	20	0	No	20	0	Not listed	Not listed	Not listed	Not listed
254	Visit_two	Two	2013-04-05	10	0	No	10	0	No	10	0	Not listed	Not listed	Not listed	Not listed
254	Visit_three	Three	2014-01-14	10	0	No	10	0	No	10	0	Not listed	Not listed	Not listed	Not listed
255	Baseline	One(baseline)	2012-04-10	20	0	No	20	4	Yes	20	4	Not listed	Not listed	Not listed	Not listed
255	Visit_two	Two	2013-02-22	20	0	No	20	4	Yes	20	4	Not listed	Not listed	Not listed	Not listed
255	Visit_three	Three	2014-02-11	20	4	Yes	20	4	Yes	20	4	Not listed	Not listed	Not listed	Not listed
256	Baseline	One(baseline)	2012-04-10	50	4	Yes	60	4	Yes	60	4	PRP + focal	PRP + focal	Completed course	Completed course
257	Baseline	One(baseline)	2012-04-10	10	0	No	20	0	No	20	0	Not listed	Not listed	Not listed	Not listed
257	Visit_two	Two	2013-03-25	20	0	No	30	0	No	30	0	Not listed	Not listed	Not listed	Not listed
257	Visit_three	Three	2014-05-13	20	0	No	30	0	No	30	0	Not listed	Not listed	Not listed	Not listed
258	Baseline	One(baseline)	2012-04-10	10	0	No	90	90		10	0	Not listed	Not listed	Not listed	Not listed
259	Baseline	One(baseline)	2012-04-12	40	4	Yes	40	0	Yes	40	4	Not listed	Not listed	Not listed	Not listed
259	Visit_two	Two	2013-03-07	30	0	No	40	3	Yes	40	3	PRP alone	PRP alone	Completed course	Completed course
259	Visit_three	Three	2014-01-09	60	4	Yes	40	4	Yes	60	4	PRP alone	PRP alone	Completed course	Completed course
260	Baseline	One(baseline)	2012-04-12	20	4	Yes	30	4	Yes	30	4	Not listed	Not listed	Not listed	Not listed
260	Visit_two	Two	2013-03-28	20	4	Yes	30	0	No	30	4	Not listed	Not listed	Not listed	Not listed
260	Visit_three	Three	2014-02-20	20	4	Yes	20	0	No	20	4	Not listed	Not listed	Not listed	Not listed
261	Baseline	One(baseline)	2012-04-12	20	0	No	10	0	No	20	0	Not listed	Not listed	Not listed	Not listed
261	Visit_two	Two	2013-05-16	20	4	Yes	20	4	Yes	20	4	Not listed	Not listed	Not listed	Not listed
261	Visit_three	Three	2014-03-06	20	4	Yes	30	4	Yes	30	4	Not listed	Not listed	Not listed	Not listed
262	Baseline	One(baseline)	2012-04-12	10	0	No	10	0	No	10	0	Not listed	Not listed	Not listed	Not listed
262	Visit_two	Two	2013-03-21	10	0	No	10	0	No	10	0	Not listed	Not listed	Not listed	Not listed
262	Visit_three	Three	2014-01-30	20	0	No	20	0	No	20	0	Not listed	Not listed	Not listed	Not listed
263	Baseline	One(baseline)	2012-04-12	20	4	Yes	20	3	Yes	20	4	Not listed	Not listed	Not listed	Not listed
263	Visit_two	Two	2013-01-31	20	4	Yes	20	0	No	20	4	Not listed	Not listed	Not listed	Not listed
263	Visit_three	Three	2014-02-13	30	0	No	30	4	Yes	30	4	Not listed	Not listed	Not listed	Not listed
264	Baseline	One(baseline)	2012-04-13	10	0	No	10	0	No	10	0	Not listed	Not listed	Not listed	Not listed
264	Visit_two	Two	2013-02-22	10	0	No	10	0	No	10	0	Not listed	Not listed	Not listed	Not listed
264	Visit_three	Three	2014-03-25	10	0	No	10	0	No	10	0	Not listed	Not listed	Not listed	Not listed
265	Baseline	One(baseline)	2012-04-13	10	0	No	10	0	No	10	0	Not listed	Not listed	Not listed	Not listed
265	Visit_two	Two	2013-02-22	10	0	No	10	0	No	10	0	Not listed	Not listed	Not listed	Not listed
265	Visit_three	Three	2014-03-25	10	0	No	10	0	No	10	0	Not listed	Not listed	Not listed	Not listed
266	Baseline	One(baseline)	2012-04-13	90	90		90	90		90	90	Not listed	Not listed	Not listed	Not listed
266	Visit_two	Two	2013-02-25	90	90		90	90		90	90	Not listed	Not listed	Not listed	Not listed
266	Visit_three	Three	2014-04-11	90	90		90	90		90	90	Not listed	Not listed	Not listed	Not listed
267	Baseline	One(baseline)	2012-04-13	20	4	Yes	10	0	No	20	4	Not listed	Not listed	Not listed	Not listed
267	Visit_two	Two	2013-03-15	20	4	Yes	10	0	No	20	4	Focal alone	Not listed	Completed course	Not listed
267	Visit_three	Three	2014-03-25	20	4	Yes	20	2	No	20	4	Not listed	Not listed	Not listed	Not listed
268	Baseline	One(baseline)	2012-04-13	10	0	No	10	0	No	10	0	Not listed	Not listed	Not listed	Not listed
268	Visit_two	Two	2013-03-22	10	0	No	10	0	No	10	0	Not listed	Not listed	Not listed	Not listed
268	Visit_three	Three	2014-02-18	10	0	No	10	0	No	10	0	Not listed	Not listed	Not listed	Not listed
269	Baseline	One(baseline)	2012-04-13	10	0	No	20	0	No	20	0	Not listed	Not listed	Not listed	Not listed
269	Visit_two	Two	2013-04-12	20	0	No	20	0	No	20	0	Not listed	Not listed	Not listed	Not listed
269	Visit_three	Three	2014-03-04	10	0	No	10	0	No	10	0	Not listed	Not listed	Not listed	Not listed
270	Baseline	One(baseline)	2012-04-13	10	0	No	10	0	No	10	0	Not listed	Not listed	Not listed	Not listed
271	Baseline	One(baseline)	2012-04-13	20	0	No	10	0	No	20	0	Not listed	Not listed	Not listed	Not listed
271	Visit_two	Two	2013-04-05	20	0	No	10	0	No	20	0	Not listed	Not listed	Not listed	Not listed
271	Visit_three	Three	2014-04-08	20	0	No	10	0	No	20	0	Not listed	Not listed	Not listed	Not listed
272	Baseline	One(baseline)	2012-04-13	20	0	No	20	0	No	20	0	Not listed	Not listed	Not listed	Not listed
272	Visit_two	Two	2013-02-22	20	0	No	20	0	No	20	0	Not listed	Not listed	Not listed	Not listed
272	Visit_three	Three	2014-02-21	30	0	No	30	0	No	30	0	Not listed	Not listed	Not listed	Not listed
273	Baseline	One(baseline)	2012-04-16	20	4	Yes	20	0	No	20	4	Not listed	Not listed	Not listed	Not listed
273	Visit_two	Two	2013-02-22	20	0	No	20	0	No	20	0	Not listed	Not listed	Not listed	Not listed
273	Visit_three	Three	2014-02-21	10	0	No	30	0	No	30	0	Not listed	Not listed	Not listed	Not listed
274	Baseline	One(baseline)	2012-04-16	20	0	No	20	0	No	20	0	Not listed	Not listed	Not listed	Not listed
274	Visit_two	Two	2013-03-15	10	0	No	20	0	No	20	0	Not listed	Not listed	Not listed	Not listed
274	Visit_three	Three	2014-02-21	20	0	No	20	0	No	20	0	Not listed	Not listed	Not listed	Not listed
275	Baseline	One(baseline)	2012-04-16	20	0	No	10	0	No	20	0	Not listed	Not listed	Not listed	Not listed
275	Visit_two	Two	2013-03-15	20	0	No	20	0	No	20	0	Not listed	Not listed	Not listed	Not listed
275	Visit_three	Three	2014-03-25	20	0	No	20	0	No	20	0	Not listed	Not listed	Not listed	Not listed
277	Baseline	One(baseline)	2012-04-17	10	0	No	10	0	No	10	0	Not listed	Not listed	Not listed	Not listed
277	Visit_two	Two	2013-04-19	20	0	No	20	0	No	20	0	Not listed	Not listed	Not listed	Not listed
277	Visit_three	Three	2014-02-25	20	0	No	10	0	No	20	0	Not listed	Not listed	Not listed	Not listed
278	Baseline	One(baseline)	2012-04-17	20	0	No	10	0	No	20	0	Not listed	Not listed	Not listed	Not listed
278	Visit_two	Two	2013-04-05	10	0	No	10	0	No	10	0	Not listed	Not listed	Not listed	Not listed
278	Visit_three	Three	2013-12-17	10	0	No	10	0	No	10	0	Not listed	Not listed	Not listed	Not listed
279	Baseline	One(baseline)	2012-04-17	10	0	No	20	0	No	20	0	Not listed	Not listed	Not listed	Not listed
279	Visit_two	Two	2013-03-11	10	0	No	20	0	No	20	0	Not listed	Not listed	Not listed	Not listed
279	Visit_three	Three	2014-01-28	10	0	No	20	0	No	20	0	Not listed	Not listed	Not listed	Not listed
280	Baseline	One(baseline)	2012-04-17	60	4	Yes	50	4	Yes	60	4	PRP + grid	PRP + grid	Started but not completed	Started but not completed
280	Visit_two	Two	2013-03-01	60	4	Yes	50	4	Yes	60	4	PRP + grid	PRP + grid	Completed course	Completed course
280	Visit_three	Three	2014-02-25	60	4	Yes	50	4	Yes	60	4	PRP + grid	PRP alone	Completed course	Completed course
281	Baseline	One(baseline)	2012-04-17	20	4	Yes	20	4	Yes	20	4	Not listed	Not listed	Not listed	Not listed
281	Visit_two	Two	2013-03-15	20	0	No	20	4	Yes	20	4	Not listed	Not listed	Not listed	Not listed
281	Visit_three	Three	2014-02-21	20	4	Yes	20	4	Yes	20	4	Not listed	Not listed	Not listed	Not listed
282	Baseline	One(baseline)	2012-04-17	20	0	No	10	0	No	20	0	Not listed	Not listed	Not listed	Not listed
283	Baseline	One(baseline)	2012-04-17	10	0	No	10	0	No	10	0	Not listed	Not listed	Not listed	Not listed
283	Visit_two	Two	2013-04-19	10	0	No	10	0	No	10	0	Not listed	Not listed	Not listed	Not listed
283	Visit_three	Three	2014-02-11	10	0	No	10	0	No	10	0	Not listed	Not listed	Not listed	Not listed
284	Baseline	One(baseline)	2012-04-19	40	2	Yes	30	2	No	40	2	Not listed	Not listed	Not listed	Not listed
284	Visit_two	Two	2013-06-06	50	4	Yes	60	4	Yes	60	4	PRP + focal	PRP alone	Completed course	Completed course
284	Visit_three	Three	2014-01-09	40	4	Yes	40	4	Yes	40	4	Not listed	Not listed	Not listed	Not listed
285	Baseline	One(baseline)	2012-04-19	20	0	No	20	2	No	20	2	Not listed	Not listed	Not listed	Not listed
285	Visit_two	Two	2013-03-07	30	0	No	20	0	No	30	0	Not listed	Not listed	Not listed	Not listed
285	Visit_three	Three	2014-01-23	30	0	No	20	0	No	30	0	Not listed	Not listed	Not listed	Not listed
286	Baseline	One(baseline)	2012-04-19	10	0	No	10	0	No	10	0	Not listed	Not listed	Not listed	Not listed
286	Visit_two	Two	2013-01-31	10	0	No	10	0	No	10	0	Not listed	Not listed	Not listed	Not listed
286	Visit_three	Three	2014-01-30	10	0	No	10	0	No	10	0	Not listed	Not listed	Not listed	Not listed
287	Baseline	One(baseline)	2012-04-19	10	0	No	10	0	No	10	0	Not listed	Not listed	Not listed	Not listed
287	Visit_two	Two	2013-03-21	10	0	No	10	0	No	10	0	Not listed	Not listed	Not listed	Not listed
287	Visit_three	Three	2014-01-30	10	0	No	20	0	No	20	0	Not listed	Not listed	Not listed	Not listed
288	Baseline	One(baseline)	2012-04-19	10	0	No	10	0	No	10	0	Not listed	Not listed	Not listed	Not listed
288	Visit_two	Two	2013-04-18	10	0	No	10	0	No	10	0	Not listed	Not listed	Not listed	Not listed
288	Visit_three	Three	2014-03-13	10	0	No	10	0	No	10	0	Not listed	Not listed	Not listed	Not listed
289	Baseline	One(baseline)	2012-04-19	10	0	No	20	0	No	20	0	Not listed	Not listed	Not listed	Not listed
289	Visit_two	Two	2013-04-04	10	0	No	10	0	No	10	0	Not listed	Not listed	Not listed	Not listed
289	Visit_three	Three	2014-03-13	10	0	No	10	0	No	10	0	Not listed	Not listed	Not listed	Not listed
290	Baseline	One(baseline)	2012-04-20	60	4	Yes	60	4	Yes	60	4	PRP + grid	PRP + grid	Completed course	Completed course
290	Visit_two	Two	2013-04-12	60	4	Yes	60	4	Yes	60	4	PRP alone	PRP + grid	Completed course	Completed course
291	Baseline	One(baseline)	2012-04-20	10	0	No	10	0	No	10	0	Not listed	Not listed	Not listed	Not listed
291	Visit_two	Two	2013-03-25	10	0	No	30	0	No	30	0	Not listed	Not listed	Not listed	Not listed
291	Visit_three	Three	2014-03-04	10	0	No	20	0	No	20	0	Not listed	Not listed	Not listed	Not listed
292	Baseline	One(baseline)	2012-04-20	10	0	No	10	0	No	10	0	Not listed	Not listed	Not listed	Not listed
292	Visit_two	Two	2013-02-25	10	0	No	10	0	No	10	0	Not listed	Not listed	Not listed	Not listed
292	Visit_three	Three	2014-03-28	10	0	No	10	0	No	10	0	Not listed	Not listed	Not listed	Not listed
293	Baseline	One(baseline)	2012-04-20	10	0	No	20	0	No	20	0	Not listed	Not listed	Not listed	Not listed
293	Visit_two	Two	2013-03-01	10	0	No	20	0	No	20	0	Not listed	Not listed	Not listed	Not listed
293	Visit_three	Three	2014-03-04	10	0	No	20	0	No	20	0	Not listed	Not listed	Not listed	Not listed
294	Baseline	One(baseline)	2012-04-20	40	4	Yes	40	0	Yes	40	4	PRP + focal	PRP alone	Completed course	Completed course
294	Visit_two	Two	2013-03-25	40	4	Yes	40	0	Yes	40	4	Not listed	Not listed	Not listed	Not listed
294	Visit_three	Three	2014-03-04	40	4	Yes	60	4	Yes	60	4	PRP alone	PRP + focal	Completed course	Completed course
295	Baseline	One(baseline)	2012-04-20	10	0	No	20	0	No	20	0	Not listed	Not listed	Not listed	Not listed
295	Visit_two	Two	2013-03-18	10	0	No	10	0	No	10	0	Not listed	Not listed	Not listed	Not listed
295	Visit_three	Three	2014-03-28	20	0	No	10	0	No	20	0	Not listed	Not listed	Not listed	Not listed
296	Baseline	One(baseline)	2012-04-24	20	0	No	10	0	No	20	0	Not listed	Not listed	Not listed	Not listed
296	Visit_two	Two	2013-02-25	20	0	No	20	0	No	20	0	Not listed	Not listed	Not listed	Not listed
296	Visit_three	Three	2014-03-04	20	0	No	20	0	No	20	0	Not listed	Not listed	Not listed	Not listed
297	Baseline	One(baseline)	2012-04-24	20	4	Yes	20	4	Yes	20	4	Not listed	Focal alone	Not listed	Completed course
297	Visit_two	Two	2013-02-25	20	4	Yes	20	4	Yes	20	4	Not listed	Not listed	Not listed	Not listed
297	Visit_three	Three	2014-02-14	30	3	Yes	30	4	Yes	30	4	Not listed	Not listed	Not listed	Not listed
298	Baseline	One(baseline)	2012-04-24	20	0	No	10	0	No	20	0	Not listed	Not listed	Not listed	Not listed
298	Visit_two	Two	2013-02-25	20	0	No	10	0	No	20	0	Not listed	Not listed	Not listed	Not listed
298	Visit_three	Three	2014-04-01	20	0	No	20	0	No	20	0	Not listed	Not listed	Not listed	Not listed
299	Baseline	One(baseline)	2012-04-24	30	0	No	10	0	No	30	0	Not listed	Not listed	Not listed	Not listed
300	Baseline	One(baseline)	2012-04-24	40	4	Yes	40	4	Yes	40	4	PRP + grid	PRP + grid	Completed course	Completed course
300	Visit_two	Two	2013-04-05	40	4	Yes	40	4	Yes	40	4	PRP + focal	PRP alone	Completed course	Completed course
300	Visit_three	Three	2014-03-27	40	4	Yes	40	4	Yes	40	4	Not listed	Not listed	Not listed	Not listed
301	Baseline	One(baseline)	2012-04-24	10	0	No	10	0	No	10	0	Not listed	Not listed	Not listed	Not listed
301	Visit_two	Two	2013-03-01	10	0	No	10	0	No	10	0	Not listed	Not listed	Not listed	Not listed
302	Baseline	One(baseline)	2012-04-24	50	4	Yes	40	3	Yes	50	4	PRP + focal	PRP + focal	Started but not completed	Started but not completed
302	Visit_two	Two	2013-03-08	60	4	Yes	60	4	Yes	60	4	PRP + focal	PRP alone	Completed course	Completed course
303	Baseline	One(baseline)	2012-04-26	10	0	No	10	0	No	10	0	Not listed	Not listed	Not listed	Not listed
304	Baseline	One(baseline)	2012-04-26	10	0	No	10	0	No	10	0	Not listed	Not listed	Not listed	Not listed
304	Visit_two	Two	2013-03-07	10	0	No	10	0	No	10	0	Not listed	Not listed	Not listed	Not listed
305	Baseline	One(baseline)	2012-04-26	40	4	Yes	50	4	Yes	50	4	PRP + grid	PRP + grid	Completed course	Completed course
305	Visit_two	Two	2013-03-07	40	4	Yes	60	4	Yes	60	4	PRP + grid	PRP + grid	Completed course	Completed course
306	Baseline	One(baseline)	2012-04-26	20	0	No	10	0	No	20	0	Not listed	Not listed	Not listed	Not listed
306	Visit_two	Two	2013-05-02	20	0	No	10	0	No	20	0	Not listed	Not listed	Not listed	Not listed
306	Visit_three	Three	2014-02-27	20	0	No	10	0	No	20	0	Not listed	Not listed	Not listed	Not listed
307	Baseline	One(baseline)	2012-04-26	10	0	No	10	0	No	10	0	Not listed	Not listed	Not listed	Not listed
307	Visit_two	Two	2013-03-21	10	0	No	10	0	No	10	0	Not listed	Not listed	Not listed	Not listed
307	Visit_three	Three	2014-02-20	10	0	No	10	0	No	10	0	Not listed	Not listed	Not listed	Not listed
308	Baseline	One(baseline)	2012-04-26	10	0	No	10	0	No	10	0	Not listed	Not listed	Not listed	Not listed
308	Visit_two	Two	2013-03-21	10	0	No	10	0	No	10	0	Not listed	Not listed	Not listed	Not listed
308	Visit_three	Three	2014-02-20	10	0	No	10	0	No	10	0	Not listed	Not listed	Not listed	Not listed
309	Baseline	One(baseline)	2012-04-27	20	8	No	10	0	No	20	8	Not listed	Not listed	Not listed	Not listed
309	Visit_three	Three	2014-03-04	10	0	No	10	0	No	10	0	Not listed	Not listed	Not listed	Not listed
310	Baseline	One(baseline)	2012-04-27	20	0	No	10	0	No	20	0	Not listed	Not listed	Not listed	Not listed
310	Visit_two	Two	2013-03-01	10	0	No	10	0	No	10	0	Not listed	Not listed	Not listed	Not listed
310	Visit_three	Three	2014-03-04	10	0	No	10	0	No	10	0	Not listed	Not listed	Not listed	Not listed
311	Baseline	One(baseline)	2012-04-27	60	4	Yes	60	4	Yes	60	4	PRP + grid	PRP + grid	Completed course	Completed course
311	Visit_two	Two	2013-03-01	60	4	Yes	60	4	Yes	60	4	PRP alone	PRP alone	Started but not completed	Started but not completed
311	Visit_three	Three	2014-03-04	60	4	Yes	60	4	Yes	60	4	PRP + grid	PRP alone	Completed course	Completed course
312	Baseline	One(baseline)	2012-04-27	10	0	No	10	0	No	10	0	Not listed	Not listed	Not listed	Not listed
312	Visit_two	Two	2013-03-01	10	0	No	10	0	No	10	0	Not listed	Not listed	Not listed	Not listed
312	Visit_three	Three	2014-03-04	10	0	No	10	0	No	10	0	Not listed	Not listed	Not listed	Not listed
313	Baseline	One(baseline)	2012-04-27	10	0	No	10	0	No	10	0	Not listed	Not listed	Not listed	Not listed
313	Visit_two	Two	2013-03-11	10	0	No	10	0	No	10	0	Not listed	Not listed	Not listed	Not listed
313	Visit_three	Three	2014-01-28	10	0	No	10	0	No	10	0	Not listed	Not listed	Not listed	Not listed
314	Baseline	One(baseline)	2012-04-27	90	90		40	0	Yes	40	0	Not listed	Not listed	Not listed	Not listed
314	Visit_three	Three	2014-04-01	40	0	Yes	30	90	No	40	0	PRP alone	Not listed	Completed course	Not listed
315	Baseline	One(baseline)	2012-04-27	30	4	Yes	20	2	No	30	4	Not listed	Not listed	Not listed	Not listed
315	Visit_three	Three	2014-04-01	20	4	Yes	30	4	Yes	30	4	Not listed	Not listed	Not listed	Not listed
316	Baseline	One(baseline)	2012-04-30	10	0	No	10	0	No	10	0	Not listed	Not listed	Not listed	Not listed
316	Visit_two	Two	2013-03-01	10	0	No	10	0	No	10	0	Not listed	Not listed	Not listed	Not listed
317	Baseline	One(baseline)	2012-04-30	10	0	No	10	0	No	10	0	Not listed	Not listed	Not listed	Not listed
317	Visit_two	Two	2013-04-12	20	0	No	10	0	No	20	0	Not listed	Not listed	Not listed	Not listed
317	Visit_three	Three	2014-03-25	10	0	No	10	0	No	10	0	Not listed	Not listed	Not listed	Not listed
318	Baseline	One(baseline)	2012-04-30	10	0	No	10	0	No	10	0	Not listed	Not listed	Not listed	Not listed
318	Visit_two	Two	2013-03-18	10	0	No	10	0	No	10	0	Not listed	Not listed	Not listed	Not listed
319	Baseline	One(baseline)	2012-04-30	40	4	Yes	30	4	Yes	40	4	PRP + grid	PRP + grid	Completed course	Completed course
319	Visit_two	Two	2013-03-01	60	4	Yes	60	4	Yes	60	4	Not listed	PRP alone	Not listed	Completed course
319	Visit_three	Three	2014-02-14	60	4	Yes	40	4	Yes	60	4	PRP alone	PRP + focal	Completed course	Completed course
320	Baseline	One(baseline)	2012-04-30	20	0	No	10	0	No	20	0	Not listed	Not listed	Not listed	Not listed
320	Visit_two	Two	2013-03-01	10	0	No	10	0	No	10	0	Not listed	Not listed	Not listed	Not listed
320	Visit_three	Three	2014-03-07	20	0	No	10	0	No	20	0	Not listed	Not listed	Not listed	Not listed
321	Baseline	One(baseline)	2012-04-30	10	0	No	10	0	No	10	0	Not listed	Not listed	Not listed	Not listed
321	Visit_two	Two	2013-03-25	10	0	No	10	0	No	10	0	Not listed	Not listed	Not listed	Not listed
321	Visit_three	Three	2014-03-07	10	0	No	10	0	No	10	0	Not listed	Not listed	Not listed	Not listed
322	Visit_two	Two	2013-03-07	90	90		40	0	Yes	40	0	Not listed	Not listed	Not listed	Not listed
322	Baseline	One(baseline)	2012-05-03	90	90		20	0	No	20	0	Not listed	Not listed	Not listed	Not listed
322	Visit_three	Three	2014-02-27	90	90		40	4	Yes	40	4	Not listed	Not listed	Not listed	Not listed
323	Baseline	One(baseline)	2012-05-03	10	0	No	10	0	No	10	0	Not listed	Not listed	Not listed	Not listed
323	Visit_two	Two	2013-04-18	10	0	No	10	0	No	10	0	Not listed	Not listed	Not listed	Not listed
323	Visit_three	Three	2014-02-27	10	0	No	10	0	No	10	0	Not listed	Not listed	Not listed	Not listed
324	Baseline	One(baseline)	2012-05-03	10	0	No	10	0	No	10	0	Not listed	Not listed	Not listed	Not listed
324	Visit_two	Two	2013-02-28	10	0	No	10	0	No	10	0	Not listed	Not listed	Not listed	Not listed
326	Baseline	One(baseline)	2012-05-03	10	0	No	10	0	No	10	0	Not listed	Not listed	Not listed	Not listed
326	Visit_two	Two	2013-03-21	10	0	No	10	0	No	10	0	Not listed	Not listed	Not listed	Not listed
326	Visit_three	Three	2014-03-03	10	0	No	10	0	No	10	0	Not listed	Not listed	Not listed	Not listed
327	Visit_two	Two	2013-03-07	40	4	Yes	40	4	Yes	40	4	Focal alone	Focal alone	Listed but not started	Completed course
327	Baseline	One(baseline)	2012-05-03	50	4	Yes	50	4	Yes	50	4	PRP + focal	PRP + grid	Completed course	Completed course
327	Visit_three	Three	2014-02-13	60	4	Yes	50	4	Yes	60	4	PRP + grid	PRP alone	Completed course	Completed course
328	Baseline	One(baseline)	2012-05-03	10	0	No	10	0	No	10	0	Not listed	Not listed	Not listed	Not listed
328	Visit_two	Two	2013-03-21	10	0	No	10	0	No	10	0	Not listed	Not listed	Not listed	Not listed
328	Visit_three	Three	2014-02-13	10	0	No	10	0	No	10	0	Not listed	Not listed	Not listed	Not listed
329	Baseline	One(baseline)	2012-05-05	30	4	Yes	60	0	No	60	4	Not listed	Not listed	Not listed	Not listed
329	Visit_two	Two	2013-05-03	20	4	Yes	20	0	No	20	4	PRP alone	PRP alone	Listed but not started	Listed but not started
330	Baseline	One(baseline)	2012-05-04	60	4	Yes	90	90		60	4	PRP alone	Not listed	Completed course	Not listed
330	Visit_two	Two	2013-04-11	60	0	Yes	60	0	Yes	60	0	PRP alone	PRP alone	Completed course	Completed course
330	Visit_three	Three	2014-01-28	60	4	Yes	40	4	Yes	60	4	PRP + focal	PRP alone	Completed course	Completed course
331	Baseline	One(baseline)	2012-05-04	70	4	Yes	70	4	Yes	70	4	PRP + grid	PRP alone	Completed course	Completed course
331	Visit_two	Two	2013-03-08	70	0	Yes	71	90	Yes	71	0	PRP alone	Not listed	Completed course	Not listed
332	Baseline	One(baseline)	2012-05-04	20	2	No	40	0	Yes	40	2	Not listed	Not listed	Not listed	Not listed
332	Visit_two	Two	2013-03-08	20	4	Yes	30	0	No	30	4	Not listed	Not listed	Not listed	Not listed
332	Visit_three	Three	2014-03-28	20	0	No	20	8	No	20	8	Not listed	Not listed	Not listed	Not listed
333	Baseline	One(baseline)	2012-05-04	10	0	No	10	0	No	10	0	Not listed	Not listed	Not listed	Not listed
333	Visit_two	Two	2013-03-25	10	0	No	10	0	No	10	0	Not listed	Not listed	Not listed	Not listed
333	Visit_three	Three	2014-03-07	10	0	No	20	0	No	20	0	Not listed	Not listed	Not listed	Not listed
335	Baseline	One(baseline)	2012-05-07	40	4	Yes	30	4	Yes	40	4	Not listed	Not listed	Not listed	Not listed
335	Visit_two	Two	2013-03-11	40	4	Yes	40	4	Yes	40	4	Not listed	Not listed	Not listed	Not listed
335	Visit_three	Three	2014-03-25	50	4	Yes	40	4	Yes	50	4	PRP + focal	PRP + focal	Listed but not started	Listed but not started
336	Baseline	One(baseline)	2012-05-07	10	0	No	10	0	No	10	0	Not listed	Not listed	Not listed	Not listed
336	Visit_two	Two	2013-04-12	10	0	No	10	0	No	10	0	Not listed	Not listed	Not listed	Not listed
336	Visit_three	Three	2014-03-07	10	0	No	10	0	No	10	0	Not listed	Not listed	Not listed	Not listed
337	Baseline	One(baseline)	2012-05-08	10	0	No	10	0	No	10	0	Not listed	Not listed	Not listed	Not listed
337	Visit_three	Three	2014-01-24	10	0	No	10	0	No	10	0	Not listed	Not listed	Not listed	Not listed
338	Visit_two	Two	2013-03-11	40	4	Yes	40	4	Yes	40	4	Not listed	Not listed	Not listed	Not listed
338	Baseline	One(baseline)	2012-05-08	60	4	Yes	40	2	Yes	60	4	PRP + focal	Not listed	Completed course	Not listed
338	Visit_three	Three	2014-01-28	40	4	Yes	40	4	Yes	40	4	Not listed	Focal alone	Not listed	Completed course
339	Baseline	One(baseline)	2012-05-08	10	0	No	10	0	No	10	0	Not listed	Not listed	Not listed	Not listed
339	Visit_two	Two	2013-04-05	10	0	No	10	0	No	10	0	Not listed	Not listed	Not listed	Not listed
339	Visit_three	Three	2014-03-07	10	0	No	10	0	No	10	0	Not listed	Not listed	Not listed	Not listed
340	Baseline	One(baseline)	2012-05-08	20	4	Yes	20	0	No	20	4	Focal alone	Not listed	Completed course	Not listed
340	Visit_two	Two	2013-03-11	20	4	Yes	20	3	Yes	20	4	Not listed	Not listed	Not listed	Not listed
340	Visit_three	Three	2014-02-25	20	4	Yes	20	4	Yes	20	4	Not listed	Focal alone	Not listed	Completed course
341	Baseline	One(baseline)	2012-05-08	10	0	No	10	0	No	10	0	Not listed	Not listed	Not listed	Not listed
341	Visit_two	Two	2013-03-11	10	0	No	10	0	No	10	0	Not listed	Not listed	Not listed	Not listed
341	Visit_three	Three	2014-03-07	10	0	No	10	0	No	10	0	Not listed	Not listed	Not listed	Not listed
342	Baseline	One(baseline)	2012-05-08	20	0	No	20	0	No	20	0	Not listed	Not listed	Not listed	Not listed
342	Visit_two	Two	2013-03-11	20	0	No	20	0	No	20	0	Not listed	Not listed	Not listed	Not listed
342	Visit_three	Three	2014-03-07	20	0	No	20	0	No	20	0	Not listed	Not listed	Not listed	Not listed
343	Baseline	One(baseline)	2012-05-08	10	0	No	10	0	No	10	0	Not listed	Not listed	Not listed	Not listed
343	Visit_two	Two	2013-03-25	10	0	No	10	0	No	10	0	Not listed	Not listed	Not listed	Not listed
344	Baseline	One(baseline)	2012-05-08	10	0	No	10	0	No	10	0	Not listed	Not listed	Not listed	Not listed
344	Visit_two	Two	2013-04-05	10	0	No	10	0	No	10	0	Not listed	Not listed	Not listed	Not listed
344	Visit_three	Three	2014-03-25	20	0	No	20	0	No	20	0	Not listed	Not listed	Not listed	Not listed
345	Baseline	One(baseline)	2012-05-08	10	0	No	10	0	No	10	0	Not listed	Not listed	Not listed	Not listed
346	Baseline	One(baseline)	2012-05-10	20	4	Yes	20	4	Yes	20	4	Focal alone	Not listed	Completed course	Not listed
346	Visit_two	Two	2013-04-04	20	0	No	20	4	Yes	20	4	Not listed	Not listed	Not listed	Not listed
346	Visit_three	Three	2014-01-23	20	4	Yes	30	4	Yes	30	4	Not listed	Focal alone	Not listed	Completed course
347	Baseline	One(baseline)	2012-05-10	30	4	Yes	30	0	No	30	4	Not listed	Not listed	Not listed	Not listed
347	Visit_two	Two	2013-02-28	30	4	Yes	20	4	Yes	30	4	Focal alone	Focal alone	Completed course	Completed course
347	Visit_three	Three	2014-02-13	40	4	Yes	40	4	Yes	40	4	Focal alone	Focal alone	Completed course	Completed course
348	Baseline	One(baseline)	2012-05-10	10	0	No	10	0	No	10	0	Not listed	Not listed	Not listed	Not listed
348	Visit_two	Two	2013-03-07	10	0	No	10	0	No	10	0	Not listed	Not listed	Not listed	Not listed
348	Visit_three	Three	2014-02-13	10	0	No	10	0	No	10	0	Not listed	Not listed	Not listed	Not listed
349	Baseline	One(baseline)	2012-05-10	10	0	No	10	0	No	10	0	Not listed	Not listed	Not listed	Not listed
350	Baseline	One(baseline)	2012-05-10	40	4	Yes	40	4	Yes	40	4	Not listed	Not listed	Not listed	Not listed
350	Visit_two	Two	2013-03-07	40	4	Yes	50	4	Yes	50	4	PRP + focal	PRP alone	Listed but not started	Listed but not started
350	Visit_three	Three	2014-02-20	40	4	Yes	60	4	Yes	60	4	PRP + focal	PRP alone	Completed course	Completed course
351	Baseline	One(baseline)	2012-05-10	10	0	No	10	0	No	10	0	Not listed	Not listed	Not listed	Not listed
351	Visit_two	Two	2013-03-07	10	0	No	10	0	No	10	0	Not listed	Not listed	Not listed	Not listed
352	Baseline	One(baseline)	2012-05-10	10	0	No	10	0	No	10	0	Not listed	Not listed	Not listed	Not listed
352	Visit_two	Two	2013-03-07	10	0	No	10	0	No	10	0	Not listed	Not listed	Not listed	Not listed
352	Visit_three	Three	2014-02-27	10	0	No	10	0	No	10	0	Not listed	Not listed	Not listed	Not listed
353	Baseline	One(baseline)	2012-05-10	10	0	No	10	0	No	10	0	Not listed	Not listed	Not listed	Not listed
353	Visit_two	Two	2013-02-28	10	0	No	10	0	No	10	0	Not listed	Not listed	Not listed	Not listed
353	Visit_three	Three	2014-03-06	10	0	No	10	0	No	10	0	Not listed	Not listed	Not listed	Not listed
354	Baseline	One(baseline)	2012-05-10	10	0	No	20	0	No	20	0	Not listed	Not listed	Not listed	Not listed
354	Visit_two	Two	2013-03-21	10	0	No	30	4	Yes	30	4	Not listed	Not listed	Not listed	Not listed
354	Visit_three	Three	2014-02-13	30	0	No	30	0	No	30	0	Not listed	Not listed	Not listed	Not listed
355	Baseline	One(baseline)	2012-05-11	50	4	Yes	40	4	Yes	50	4	PRP + grid	PRP alone	Started but not completed	Started but not completed
355	Visit_two	Two	2013-03-11	40	4	Yes	60	4	Yes	60	4	PRP alone	PRP + focal	Completed course	Completed course
355	Visit_three	Three	2014-03-25	60	4	Yes	60	4	Yes	60	4	PRP alone	PRP + focal	Completed course	Completed course
356	Baseline	One(baseline)	2012-05-11	10	0	No	10	0	No	10	0	Not listed	Not listed	Not listed	Not listed
357	Baseline	One(baseline)	2012-05-11	20	0	No	20	4	Yes	20	4	Not listed	Focal alone	Not listed	Completed course
357	Visit_two	Two	2013-03-18	20	0	No	20	0	No	20	0	Not listed	Not listed	Not listed	Not listed
357	Visit_three	Three	2014-03-07	20	4	Yes	20	4	Yes	20	4	Not listed	Not listed	Not listed	Not listed
358	Baseline	One(baseline)	2012-05-11	20	0	No	20	0	No	20	0	Not listed	Not listed	Not listed	Not listed
358	Visit_two	Two	2013-04-12	20	0	No	20	0	No	20	0	Not listed	Not listed	Not listed	Not listed
358	Visit_three	Three	2014-04-15	20	0	No	20	0	No	20	0	Not listed	Not listed	Not listed	Not listed
359	Baseline	One(baseline)	2012-05-11	10	0	No	10	0	No	10	0	Not listed	Not listed	Not listed	Not listed
359	Visit_two	Two	2013-03-18	10	0	No	10	0	No	10	0	Not listed	Not listed	Not listed	Not listed
359	Visit_three	Three	2014-03-07	10	0	No	10	0	No	10	0	Not listed	Not listed	Not listed	Not listed
360	Baseline	One(baseline)	2012-05-11	10	0	No	10	0	No	10	0	Not listed	Not listed	Not listed	Not listed
360	Visit_two	Two	2013-03-01	10	0	No	10	0	No	10	0	Not listed	Not listed	Not listed	Not listed
360	Visit_three	Three	2014-03-07	10	0	No	10	0	No	10	0	Not listed	Not listed	Not listed	Not listed
362	Baseline	One(baseline)	2012-05-15	10	0	No	10	0	No	10	0	Not listed	Not listed	Not listed	Not listed
362	Visit_two	Two	2013-03-01	10	0	No	10	0	No	10	0	Not listed	Not listed	Not listed	Not listed
362	Visit_three	Three	2014-03-07	10	0	No	10	0	No	10	0	Not listed	Not listed	Not listed	Not listed
363	Baseline	One(baseline)	2012-05-15	10	0	No	10	0	No	10	0	Not listed	Not listed	Not listed	Not listed
363	Visit_two	Two	2013-03-18	10	0	No	20	0	No	20	0	Not listed	Not listed	Not listed	Not listed
364	Baseline	One(baseline)	2012-05-15	60	4	Yes	60	4	Yes	60	4	PRP + focal	PRP alone	Completed course	Completed course
365	Baseline	One(baseline)	2012-05-15	10	0	No	10	0	No	10	0	Not listed	Not listed	Not listed	Not listed
365	Visit_two	Two	2013-04-05	10	0	No	10	0	No	10	0	Not listed	Not listed	Not listed	Not listed
366	Baseline	One(baseline)	2012-05-15	40	4	Yes	40	4	Yes	40	4	PRP + focal	PRP alone	Listed but not started	Listed but not started
366	Visit_two	Two	2013-05-03	50	4	Yes	60	4	Yes	60	4	PRP + grid	PRP + grid	Started but not completed	Started but not completed
366	Visit_three	Three	2014-04-04	60	2	Yes	60	4	Yes	60	4	PRP alone	PRP + grid	Listed but not started	Listed but not started
										149
